1 **The TCP transcription factor HvTB2 heterodimerizes with VRS5(HvTB1)**  
2 **and controls spike architecture in barley.**

3

4 Tatiana de Souza Moraes<sup>\*1,2,3</sup>, Sam W. van Es<sup>\*1,2</sup>, Inmaculada Hernández-Pinzón<sup>4</sup>,  
5 Gwendolyn K. Kirschner<sup>5</sup>, Froukje van der Wal<sup>2</sup>, Sylvia Rodrigues da Silveira<sup>1,2,3</sup>, Jacqueline  
6 Busscher-Lange<sup>2</sup>, Gerco C. Angenent<sup>1,2</sup>, Matthew Moscou<sup>4</sup>, Richard G.H. Immink<sup>1,2,#</sup>, G. Wilma  
7 van Esse<sup>1,2,#</sup>

8

9 \* Equal contribution

10 # Corresponding authors

11 Richard.Immink@wur.nl; Wilma.vanEsse@wur.nl

12 <sup>1</sup> Laboratory of Molecular Biology, Wageningen University and Research, 6708 PB,  
13 Wageningen, The Netherlands

14 <sup>2</sup> Bioscience, Wageningen Plant Research, Wageningen University and Research, 6708 PB,  
15 Wageningen, The Netherlands.

16 <sup>3</sup> Laboratório de Biotecnologia Vegetal, Centro de Energia Nuclear na Agricultura,  
17 Universidade de São Paulo, Piracicaba, SP, CEP 13416-000, Brazil.

18 <sup>4</sup> The Sainsbury Laboratory, Norwich Research Park, Norwich, NR4 7UH, UK

19 <sup>5</sup> Institute of Crop Sciences and Resource Conservation (INRES), Crop Functional Genomics,  
20 University of Bonn, Germany

21

22 **Author contributions**

23 TSM, WvE, SWvE, and SRdS performed protein-protein interaction studies. FvdW, JB and WvE  
24 generated Y2H screening libraries. WvE and TSM selected CRISPR-CAS lines and performed  
25 phenotypical analysis of CRISPR-lines. WvE and TSM performed phylogenetic and haplotype  
26 analysis and genotyping of the *com1* and *int-h* lines. GK performed the *in-situ* hybridization.  
27 MM and IHP generated CRISPR-CAS9 mutants. GCA, RGHI, WvE, conceived and designed  
28 research and wrote the manuscript with contributions from all co-authors.

29

30 **Abstract**

31 Barley is the fourth largest cereal crop grown worldwide, and essential for food  
32 and feed production. Phenotypically, the barley spike, which is unbranched,  
33 occurs in two main architectural shapes: two-rowed or six-rowed. In the 6-rowed  
34 cultivars, all three florets of the triple floret meristem develop into seeds while

35 in 2-rowed lines only the central floret forms a seed. *VRS5(HvTB1)*, act as  
36 inhibitor of lateral seed outgrowth and *vrs5(hvrb1)* mutants display a six-rowed  
37 spike architecture. *VRS5(HvTB1)* is a member of the TCP transcription factor  
38 (TF) family, which often form protein-protein interactions with other  
39 transcriptional regulators to modulate the expression of their target genes.  
40 Despite the key role of *VRS5(HvTB1)* in regulating barley plant architecture,  
41 there is hardly any knowledge on its molecular mode-of-action. We performed  
42 an extensive phylogenetic analysis of the TCP transcription factor family,  
43 followed by an *in-vitro* protein-protein interaction study using yeast-two-hybrid.  
44 Our analysis shows that *VRS5(HvTB1)* has a diverse interaction capacity,  
45 interacting with class II TCP's, NF-Y TF, but also chromatin modellers. Further  
46 analysis of the interaction capacity of *VRS5(HvTB1)* with other TCP TFs shows  
47 that *VRS5(HvTB1)* preferably interacts with other class II TCP TFs within the  
48 TB1 clade. One of these interactors, encoded by *HvTB2*, shows a similar  
49 expression pattern when compared to *VRS5(HvTB1)*. Haplotype analysis of  
50 *HvTB2* suggest that this gene is highly conserved and shows hardly any  
51 variation in cultivars or wild barley. Induced mutations in *HvTB2* through  
52 CRISPR-CAS9 mutagenesis in cv. Golden Promise resulted in barley plants  
53 that lost their characteristic unbranched spike architecture. *hvtb2* mutants  
54 exhibited branches arising at the main spike, suggesting that, similar to  
55 *VRS5(HvTB1)*, *HvTB2* act as inhibitor of branching. Taken together, our  
56 protein-protein interaction studies of *VRS5(HvTB1)* resulted in the identification  
57 of *HvTB2*, another key regulator of spike architecture in barley. Understanding  
58 the molecular network, including protein-protein interactions, of key regulators

59 of plant architecture such as VRS5(HvTB1) provide new routes towards the  
60 identification of other key regulators of plant architecture in barley.

61

## 62 **Author summary**

63 Transcriptional regulation is one of the basic molecular processes that drives  
64 plant growth and development. The key TCP transcriptional regulator  
65 TEOSINTE BRANCHED 1 (TB1) is one of these key regulators that has been  
66 targeted during domestication of several crops for its role as modulator of  
67 branching. Also in barley, a key cereal crop, HvTB1 (also referred to as VRS5),  
68 inhibits the outgrowth or side shoots, or tillers, and seeds. Despite its key role  
69 in barley development, there is hardly any knowledge on the molecular network  
70 that is utilized by VRS5(HvTB1). Transcriptional regulators form homo- and  
71 heterodimers to regulate the expression of their downstream targets. Here, we  
72 performed an extensive phylogenetic analysis of TCP transcription factors  
73 (TFs) in barley, followed by protein-protein interaction studies of VRS5(HvTB1).  
74 Our analysis indicates, that VRS5(HvTB1) has a diverse capacity of interacting  
75 with class II TCPs, NF-Y TF, but also chromatin modellers. Induced  
76 mutagenesis through CRISPR-CAS mutagenesis of one of the putative  
77 VRS5(HvTB1) interactors, HvTB2, resulted in barley plants with branched  
78 spikes. This shows that insight into the VRS5(HvTB1) interactome, followed by  
79 detailed functional analysis of potential interactors is essential to truly  
80 understand how TCPs modulate plant architecture. The study presented here  
81 provides a first step to underpin the protein-protein interactome of  
82 VRS5(HvTB1) and identify other, yet unknown, key regulators of barley plant  
83 architecture.

## 84 **Introduction**

85 Plant architecture is a major determinant for yield and as such has been a target  
86 during domestication and breeding. In maize (*Zea mays*) the gene *TEOSINTE*  
87 *BRANCHED1* (*TB1*) has been selected during domestication for its role in  
88 shaping plant architecture. *TB1* inhibits the outgrowth of lateral branches and  
89 increased expression of *TB1* in maize resulted in a drastic reduction in number  
90 of branches and increased crop yield(1,2). To date, *TB1* orthologs have been  
91 targeted for its effect on improved yield in several crops including, pea, potato,  
92 barley, rice and wheat(3–7). *TB1* is a member of the plant specific TCP  
93 transcription factor family. The family name refers to the founding members *TB1*  
94 in maize, *CYCLOIDEA* (*CYC*), which is involved in controlling floral bilateral  
95 symmetry in snapdragon, and *PROLIFERATING CELL FACTORS* (*PCF1* & *2*)  
96 in rice(8,9). PCFs bind to the promoter of *PROLIFERATING CELL NUCLEAR*  
97 *ANTIGEN* (*PCNA*) to control cell cycle in meristems, as well as DNA synthesis  
98 and repair(8). This class of TF exhibits a highly conserved TCP domain, which  
99 contains a basic-Helix-Loop-Helix (bHLH) structure involved in DNA binding  
100 and protein-protein interactions(8,10). The TCP transcription factor family can  
101 be divided into two major phylogenetic clades, class I and class II. TCPs play  
102 crucial roles in controlling plant architecture(11,12). In cucumber, for example,  
103 mutations in the *TB1*-clade TCP protein *TEN*, which contains a highly  
104 conserved amino acid sequence only found in Cucurbitaceae, resulted in plants  
105 that developed shoots instead of tendrils(13). The maize *TB1*-clade gene  
106 *BRANCHED ANGLE DEFECTIVE 1* (*BAD1*) is required for normal tassel  
107 branch angle formation(14). The closely related gene in rice, known as *OsTB2*  
108 and as *RETARDED PALEA 1*, *REP1*) controls palea development and floral

109 zygomorphy. TB1, which acts as inhibitor of axillary meristem outgrowth(15–  
110 19), appears to be the most conserved member within the TCP TF family. In  
111 barley, *VRS5(HvTB1)* is a key regulator of plant architecture and yield.  
112 *VRS5(HvTB1)* is closely related to the maize domestication gene *TB1*. Barley  
113 seeds are formed on the inflorescence, which contains the grain producing  
114 florets that are arranged on a single main stem, the rachis(20). The rachis  
115 develops specialized branches called spikelets, which eventually develop into  
116 seeds located on opposite sides of the rachis. Modifications to the overall spike  
117 architecture have been vital for cereal domestication and yield  
118 improvement(21,22). In barley, the main spike (inflorescence) also underwent  
119 significant changes in architecture. For example, wild barley shatters the seeds  
120 from the main spike, a characteristic that was lost during domestication of  
121 barley(23). To date, the barley spike occurs in two main architectural shapes:  
122 two-rowed or six-rowed. In two-rowed lines, only the central floret develops into  
123 a seed, in contrast to six-rowed cultivars in which all three florets develop into  
124 seeds. *VRS5(HvTB1)* act as inhibitor of lateral seed formation, and as such  
125 *VRS5(HvTB1)* has been selected in six-rowed barley cultivars for its role in  
126 shaping spike architecture(5). Detailed phenotypical analysis showed that  
127 *vrs5(hv**tb**1)* mutants also exhibit an increased tiller number at early  
128 developmental stages(5,24,25). This suggests that, similar to its maize  
129 counterpart *VRS5(HvTB1)* inhibits the outgrowth of lateral branches.  
130 Despite the key roles of *VRS5(HvTB1)* in barley development, there is hardly  
131 any knowledge on the molecular network in which *VRS5(HvTB1)* is active.  
132 .Here we performed a comprehensive analysis of barley TCP genes and their  
133 chromosomal location. In total, we identified 21 barley TCPs: 11 class I and 10

134 class II. Given the key roles of TB1 in plant development, we focused on  
135 VRS5(HvTB1) and performed an unbiased Y2H screen to identify potential  
136 protein-protein interactors and to shed light on its molecular mode of action.  
137 This analysis was followed by a more detailed analysis of candidate interactors  
138 within the class II TCP TF family. We generated a CRISPR-CAS9 induced  
139 mutation in one of the genes encoding a putative VRS5(HvTB1) interactors,  
140 *HvTB2*. Our data shows that barley plants that do not have functional HvTB2  
141 develop spikes that lost their characteristic determinate growth pattern. Taken  
142 together, our analysis shows that VRS5(HvTB1) has the capacity to  
143 heterodimerize with other transcriptional regulators, including closely related  
144 class II TCPs. Phenotypical analysis of one of the putative interactors shows  
145 that other class II TCPs, besides VRS5(HvTB1), are involved in controlling  
146 spike architecture in barley.

147

## 148 **Results**

149

### 150 **Barley class II TCPs have a grass-specific sister clade of TB1**

151 To elucidate the phylogenetic relations of the barley TCPs, a maximum  
152 likelihood (ML) phylogenetic tree was built including all known members of the  
153 barley, wheat, Arabidopsis, rice and maize TCP transcription factor families.  
154 With exception of wheat and barley, all sequences were extracted from the  
155 iTak(26) and grassius database(27). Wheat TCP genes were extract from Zhao  
156 *et al.* (28). For barley and wheat, the TCPs were compared to the newest  
157 reference genomes available(29). The multiple sequence alignment was  
158 manually curated and non-aligning sequences were removed. For barley, this  
159 included HORVU6Hr1G093970.1 which is truncated and not present in the

160 newest reference genome(29) (S1 Table). For wheat, this included TaPCF7.A,  
161 TaPCF7.B, TaPCF7.D, which did not contain a TCP domain; and TaTCP19,  
162 which was partially truncated. In total 21 barley TCPs, 22 rice TCPs, 24  
163 Arabidopsis TCPs, 62 wheat TCPs and 46 maize TCPs were included in the  
164 analysis (S2 Table). Similar to the situation in other plants, barley TCPs  
165 grouped into two main classes, class I (PCF) and class II (CIN/CYC/TB1) (Fig  
166 1). Out of the 21 barley TCPs, 19 exhibit a similar genomic organization with  
167 either wheat or rice (S1 Fig). Barley TCPs have a close phylogenetic  
168 relationship to hexaploid wheat, which contains three copies of each TCP on  
169 the A, B and D genomes. Similar to wheat(28), the TB1 locus is duplicated in  
170 barley, with a copy on chromosomes 4 and 5 (Fig 1A, S1 Table). VRS5(HvTB1)  
171 and TaTB1, both located on chromosome 4, are known regulators of  
172 inflorescence architecture. However no function has been attributed to their  
173 paralogs, HvTB1-like and TaTB1.2 , on chromosome 5.

174 Barley HvTB2 and HvTCP15 fall together with ZmBAD1 and OsTB2 into a sister  
175 clade of TB1 (Fig 1A). To further elucidate the origin of this subclade, we  
176 performed a phylogenetic analysis comparing HvTB-like genes in 19 monocot  
177 and eudicot plant species. This analysis shows that both HvTB2 and HvTCP15  
178 fall into a grass-specific sister clade of TB1 (S2 Fig). Within this clade, HvTB1  
179 is more similar to ZmBAD1 and to OsTB2, while HvTB15 is most similar to  
180 OsTCP15 and the sorghum multiseeded1 (msd1) TF, which is well known for  
181 regulating inflorescence architecture(30). Taken together, similar to maize and  
182 rice, the barley and wheat TCP TF families have a grass-specific sister clade.

183

184 **VRS5(HvTB1) forms heterodimers with closely related class II TCP TF**

185 TCP transcription factors can form homo- and heterodimers, which affect their

186 DNA binding capacity and specificity. To evaluate the protein-protein interaction

187 capacity of barley VRS5(HvTB1) we performed unbiased and targeted yeast

188 two-hybrid (Y2H)-based screenings using this TCP protein as bait. Because of

189 autoactivation of yeast reporter genes, the N-terminal part of the HvTB1 protein

190 was removed (VRS5(HvTB1<sup>NtDEL83</sup>)). Subsequently, we generated a Y2H cDNA

191 expression library of the early and late developmental stages of the barley shoot

192 apical meristem (SAM), respectively (S3 Fig). These stages were selected as

193 VRS5(HvTB1) is highly expressed in the developing SAM (Fig 2B). Screening

194 of VRS5(HvTB1<sup>NtDEL83</sup>) against the barley cDNA libraries resulted in the

195 identification of 114 positive colonies, from which 16 encoded unique proteins

196 in frame with the GAL4 AD-domain (S3 Table). Amongst these are

197 SWItch/Sucrose Non-Fermentable (SWI/SNF) complex subunits, Nuclear

198 transcription factor Y (NF-Y) and HvTCP2.

199 It is well known that TCP proteins interact amongst each other with a preference

200 for interaction with other members within the same clade(31). However,

201 interactions can be easily missed in a library screening. Therefore, we decided

202 to evaluated the interaction between VRS5(HvTB1<sup>NtDEL83</sup>) in the BD vector and

203 against a Arabidopsis TF Y2H library(32) in a heterologous Y2H screen. In this

204 screen, we identified AtTCP1 (AT1G67260) and AtBRC1(AT3G18550), both

205 class II TCPs, as interactors. No interaction was observed with any of the class

206 I TCP proteins, as expected. Within the heterologous screen, we also observed

207 an interaction with AtNF-Y proteins, which confirms the interaction found with

208 barley NF-Y factors in the barley cDNA library screen. Moreover, VRS5(HvTB1)



209 was capable of interacting with Arabidopsis HOMEODOMAIN-containing  
210 proteins, and MYB-like transcriptional regulators (S3 Table).

211 To further evaluate protein interactions of VRS5(HvTB1), we investigated its  
212 capacity to form complexes with other class II TCPs in barley. For this we  
213 selected as preys: HvTCP1, HvTCP21 and HvTCP2 which belong to the CIN  
214 clade; and the four class II TCPs within the TB1 and CYC/BAD1 clade (Fig. 1).  
215 In this targeted analysis, two VRS5(HvTB1) protein variants were included,  
216 encoded by two natural alleles, the a and b allele, which correspond to the six-  
217 rowed and two-rowed cultivars, respectively(5). Because of autoactivation by  
218 the selected class II TCP proteins, no complete pair-wise matrix-based screen  
219 could be performed. For this reason, we generated N-terminal deletion variants  
220 for VRS5(HvTB1), HvTB1-like and HvTB2 and used these truncated proteins  
221 as baits. VRS5(HvTB1) and HvTB1-like showed a weak homo- and  
222 heterodimerization capacity (Fig 2A, S4 Fig). No difference in this homo- and  
223 hetero dimerization capacity was observed between the a- and b allele variants  
224 of VRS5(HvTB1). Both VRS5/TB1 and TB1-like proteins showed a consistent  
225 interaction with HvTB2, HvTCP15 and HvTCP2 (Fig 2A). Vice versa, HvTB2  
226 interacted with both VRS5(HvTB1) and HvTB1-like. No interaction was  
227 observed between VRS5(HvTB1) or HvTB1-like and the CIN-clade proteins,  
228 HvTCP1 and HvTCP21. Altogether these experiments revealed that the barley  
229 TB1-like TCPs preferentially interact with closely related members within the  
230 class II clade of TCP proteins.

231 For biological relevance, genes encoding interacting proteins should be co-  
232 expressed and therefore, we compared the expression patterns and levels of  
233 *VRS5(HvTB1)* and of the genes encoding the interacting TCP TF in the

234 developing shoot apex by re-analysing available RNA-Seq data of cv. Bowman  
235 apical meristems(33,34). *VRS5(HvTB1)* and *HvTB2* have a low expression at  
236 the double ridge stage, which increases in the lemma and stamen primordia  
237 stages (LP/SP) and up to the awn primordia stage (AP) (Fig 2B). In comparison,  
238 *HvTB1-like* and *HvTCP15* are lowly expressed within the developing shoot  
239 apex at all three investigated developmental stages. *HvTCP2* is highly  
240 expressed in the shoot apex, but follows an opposite trend in time when  
241 compared to *VRS5(HvTB1)* and *HvTB2*. Taken together, *HvTB2* follows a  
242 similar expression pattern as it's interaction partner *VRS5(HvTB1)*.

243

244

#### 245 **Barley HvTB2 controls spike branching**

246 *HvTB2* is a putative interactor of *VRS5(HvTB1)*, and follows a similar  
247 expression pattern when compared to *VRS5(HvTB1)* (Fig 2). Moreover, our  
248 phylogenetic analysis showed that *HvTB2* is closely related to maize *ZmBAD1*  
249 and *OsTB2*, with similar domain architecture when compared to *ZmBAD1* (Fig  
250 1). These observations prompted us to study the function of *HvTB2* in more  
251 depth and led to the hypothesis that *HvTB2* influences inflorescence  
252 architecture in barley, at least partially in concert with *VRS5(HvTB1)*. To test  
253 this hypothesis, we generated targeted mutations in *HvTB2* using CRISPR-  
254 CAS9 gene editing in barley cv. Golden Promise (GP). Aiming at larger  
255 deletions and a specific null mutant for this TCP gene, three guides were used,  
256 all targeting the N-terminal part of *HvTB2* before the conserved TCP domain  
257 (Fig 3A, S5 Fig). In total, 38 CAS9 positive plants were generated, from which  
258 one showed a putative biallelic event. Screening of the T2 transformants of this

259 line resulted in two novel *HvTB2* alleles, *hvtb2-1* and *hvtb2-2*, containing a 56bp  
260 deletion and a 184bp insertion, respectively (Fig 3A). In both *hvtb2-1* and *hvtb2-*  
261 *2* the mutational event caused a frame shift before the TCP domain, thereby  
262 generating full null mutants of *HvTB2*. Both mutants exhibited spikes that lost  
263 the characteristic determinant growth pattern, with branches forming on the  
264 main rachis (Fig 3B). The seed bearing branches were significantly shorter  
265 when compared to the main spike (Fig 3C, Table S5). The outgrowth of  
266 branches from the main rachis occurred mainly on the basal part of the spike  
267 (S6 Fig). In addition, we also observed that some of the basal seeds in *hvtb2*  
268 showed two awns and/or fused seeds, a phenotype that does not occur in the  
269 wild type GP (Fig 3B). Due to the reduced spike length, the total number of  
270 grains was only moderately increased in the *hvtb2* lines, despite the presence  
271 of lateral branches (S7C Fig). The thousand grain weight (TGW) and grain  
272 width was significantly reduced in the *hvtb2*-lines (Fig 3D; S7D- S7E Fig).  
273 Overall, the grain size in the lateral branches was reduced when compared to  
274 the main spike (S7D- S7E Fig). Interestingly, *hvtb2* mutants displayed a  
275 significant increase in tiller number when compared to the wild type GP (Fig  
276 3E). Taken together, our data suggest that *HvTB2* influences multiple yield-  
277 related traits throughout barley development, similar to *VRS5*(*HvTB1*). The  
278 macroscopic phenotype resembles previously described phenotype for  
279 *intermedium-h* (*int-h*) and *compositum 1* (*com1*)(35,36). Targeted PCR  
280 amplification showed no amplicon in the coding sequence or promoter region  
281 of *int-h.42*, *int-h.43* and *int-h.44*, *int-h.83*, *com1.a* and *com1.b* (S8A Fig). Two of  
282 the lines tested, *int-h.83* and *com1.c* contained a nonsynonymous mutation that  
283 resulted in an amino acid change within the conserved TCP domain (S8B-S8C

284 Fig). Therefore, *HvTB2* is a good candidate gene for the *int-h* and *com1* loci.

285 Taken together, we identified *HvTB2* as gene controlling spike architecture.

286

### 287 ***hvtb2* acts as a boundary gene**

288 To determine the origin of the lateral branches that appear on the main rachis  
289 we compared the morphology of wildtype GP and *hvtb2* mutants at LP/SP using  
290 scanning electron microscopy. In GP the triple spikelet meristem is formed and  
291 outgrowth of lateral branches is suppressed. In contrast, the central spikelet at  
292 the base of the meristem of *hvtb2* mutants is enlarged, resembling a branch  
293 meristem instead of a triple spikelet meristem (Fig 4A). This altered  
294 development mainly occurs at the basal part of the spike. In line with this the  
295 branches in the mature spike are only observed in the first five rachis nodes  
296 (S6 Fig). Overall, no major differences were observed in leaf number or the  
297 overall developmental speed of the apex (S9 Fig), suggesting that *HvTB2*  
298 mainly acts on inhibition of the spike branching. The lateral spike branch  
299 showed an indeterminate growth pattern, and continued to grow and  
300 differentiate after producing the floret meristems. The branch meristem-like  
301 structures are still vegetative at the stamen primordium stage (Fig 4A), and start  
302 to initiate spikelet primordia when the inflorescence transitions to the awn  
303 primordium stage (S9 Fig). No major phenotypes were observed at the double  
304 ridge stage (S9A Fig). In line with this, expression of *HvTB2* is low in this tissue  
305 and not yet localized to the spikelet primordia (Fig 2, S9 Fig). RNA *In-situ*  
306 hybridization shows that, at the awn primordium stage, *HvTB2* mRNA is mainly  
307 expressed at spikelet meristem boundaries (Fig 4B, S10 Fig). This suggest that  
308 *HvTB2* may act within the triple floret meristem as boundary gene.

309 Next, we evaluated to what extent *HvTB2* influences the expression of other,  
310 known regulators of row-type architecture. To this end, we performed RT-PCR  
311 analysis in immature shoot apices of *tb2-1* and *tb2-2* mutants compared to wild  
312 type GP lines. Two developmental stages were selected, the lemma and  
313 stamen primordia stage (LP/SP) and the awn primordium stage (AP), where at  
314 the LP/SP a significant downregulation of *HvTB2* was observed. With exception  
315 of *VRS2*, which was significantly upregulated at the LS/SP stage, none of the  
316 other row-type genes was changed in expression in neither *tb2-1* nor *tb2-2*. We  
317 also included *SQUAMOSA PROMOTER-BINDING-LIKE8 (SPL8*;  
318 HORVU0Hr1G039150)(37). In maize the SPL8-like gene *LIGULELESS 1*  
319 (*LG1*), act downstream of *ZmRAMOSA2 (RA2)* and *ZmBAD1(14)*. Interestingly,  
320 *SPL8* is significantly downregulated in the *hvtb2-2* mutant at the AP stage,  
321 suggesting that like in maize SPL8-like genes act downstream of *hvtb2*. Taken  
322 together, our detailed phenotypical analysis indicates that *HvTB2* controls spike  
323 determinacy and acts as a boundary gene.

324

### 325 **Barley *HvTB2* is highly conserved.**

326 *TB1* is a well-known gene targeted during domestication of several crops  
327 including maize, wheat, rice and barley. To evaluate if *HvTB2* is also subjected  
328 to selection we performed a haplotype analysis based on available single-  
329 nucleotide polymorphism (SNP) (38,39). To assess both natural variation and  
330 possible selection through breeding, sequences from cultivars and landraces  
331 were included. For comparison, *VRS5(HvTB1)* was also included in the  
332 analysis. Our analysis indicates that there are 4 major *VRS5(HvTB1)*  
333 haplotypes. Two major haplotypes, *HvTB1.a* and *HvTB1.b*, are primarily found  
334 in 6-rowed and 2-rowed cultivars respectively (S10 Fig), corroborating previous

335 reports(5). Based on the PROVEAN score for conservation analysis no major  
336 functional changes are expected by the difference between the *HvTB1.a* and  
337 *HvTB1.b* alleles (S11 Fig). Haplotype analysis on *HvTB2* shows two major  
338 haplotypes (HAP1 and HAP2), and six minor haplotypes. Form these, four  
339 minor haplotypes did not cause a change in the amino acid sequence when  
340 compared to HAP1 (Fig 5). For the other remaining haplotypes, no changes  
341 were observed in the conserved TCP domain. Based in the PROVEAN score  
342 for conservation analysis no functional changes are expected between the  
343 haplotypes (S8C Fig). None of the haplotypes identified were specific for either  
344 2-rowed or 6-rowed cultivars nor for wild barley, landraces or cultivars (Fig 5).  
345 Taken together, our results indicates that there is very little variation within the  
346 *HvTB2* gene.

347

348

349 **Discussion**

350

351 TCP transcription factors are essential for growth and development of plants  
352 and involved in a plethora of processes. They are a widespread family of  
353 transcriptional regulators occurring in multicellular algae, monocots and  
354 dicots(40,41). In this study we performed a detailed phylogenetic analysis of  
355 barley TCP transcription factors and evaluated the protein-protein interactions  
356 of VRS5(HvTB1). One of the identified interactors and closely related protein,  
357 HvTB2 showed a similar expression pattern. Targeted mutagenesis showed  
358 that HvTB2 is essential for maintaining barley spike architecture. Taken  
359 together, this work increases our understanding of the role of TCP transcription  
360 factors in shaping barley plant architecture.

361

362 TCP transcription factors can form homo- and heterodimers, which affect their  
363 DNA binding capacity and specificity. They interact with a plethora of other  
364 proteins, including components of the circadian clock and various other  
365 transcriptional regulators(40,42). Within the unbiased screen of VRS5(HvTB1)  
366 against the Y2H barley cDNA libraries we identified SWItch/Sucrose Non-  
367 Fermentable (SWI/SNF) complex subunits. At the protein level, the activity of  
368 CIN-like TCPs is known to be regulated by several chromatin remodelling  
369 complexes including SWI/SNF(43,44). The interaction of VRS5(HvTB1) with  
370 SWI/SNF might point towards a conserved mechanism, where the activity of  
371 TB1 is modulated by chromatin remodelling factors at the protein level, similar  
372 to the CIN-like TCPs. We also identified other transcriptional regulators such as  
373 TCPs and NF-Y amongst the interactors of VRS5(HvTB1) in both the unbiased

374 screen and the heterologous screen against the Arabidopsis TF collection.  
375 Large scale Y2H interaction studies in Arabidopsis showed an interaction  
376 between AtBRC1 with NFY9(45). NF-Y proteins are a large family of  
377 transcriptional regulators known to act in several plant developmental  
378 processes and abiotic stress responses(46). It therefore remains to be  
379 evaluated how specific the interaction between VRS5(HvTB1) and members of  
380 the SWI/SNF chromatin remodelling and NF-Y TF family are. Nevertheless, our  
381 analysis shows a glimpse into the putative protein-protein interactome of  
382 VRS5(HvTB1)  
383 Further, more detailed analysis using barley class II TCPs show that within the  
384 class II TCPs VRS5(HvTB1) preferably heterodimerizes with the CYC/TB1  
385 clade rather than the CIN clade. One of these key putative VRS5(HvTB1)  
386 interactors identified is HvTB2 which, similar to VRS5(HvTB1), inhibits the  
387 outgrowth tillers. However, some difference in functionality also occurs. While  
388 VRS5(HvTB1) inhibits the outgrowth of lateral florets in the main spike through  
389 regulation of VRS1(HvHOX1), HvTB2 does not show an obvious row-type  
390 phenotype. Instead, HvTB2 suppresses the outgrowth of branches from the  
391 main spike. This points towards a mechanism in which VRS5(HvTB1) and  
392 HvTB2 are only partially redundant. Taken together, VRS5(HvTB1)  
393 heterodimerizes with other transcriptional regulators. To what extent the  
394 heterodimerization of VRS5(HvTB1) influences DNA binding and subsequent  
395 transcriptional regulation of the target genes remains to be elucidated. Taken  
396 together, our analysis opens up the opportunity for expanding the  
397 VRS5(HvTB1) interactome and the subsequent identification of other key  
398 regulators of plant architecture such as HvTB2.



399 Genome duplication and diversification has played a major role in the evolution  
400 of the TCP transcription factor family. For example, mosses and ferns contain  
401 five to six members(41), whereas the dicot model system *Arabidopsis* has  
402 24(47). The gene duplication events are not always uniform, maize for example  
403 mainly shows duplicates in the CYC/TB1 clade. We identified 21 TCP  
404 transcription factors in barley and 62 in wheat. Wheat contains mostly three  
405 orthologues when compared to barley, representing the hexaploidy nature of  
406 the genome. Like in maize and rice, barley and wheat have additional grass-  
407 specific duplicates in the TB1/CYC clade. Within this clade both barley and  
408 wheat contain close homologues, such as maize *ZmBAD1* and rice *OstTB2*  
409 genes, *HvTB2* and *TaTCP24*, respectively. Although these genes are  
410 phylogenetically closely related, vast differences in functionality are observed.  
411 *ZmBAD1* (also referred to as *WAB1*) is expressed in the pulvinus where it  
412 regulates branch angle in the tassel(14,48). *OstTB2* (also referred to as *REP1*)  
413 is expressed in the palea primordium during early flower development and in  
414 later stages in the stamens and vascular bundles of the lemma and  
415 palea(11,12). It is involved in palea development and floral zygomorphy in rice.  
416 Recent studies have shown that *OstTB2* is also expressed in the basal tiller  
417 node where it induces the outgrowth of tillers(12). *OstTB1* and *OstTB2* act  
418 antagonistically on tiller development. *HvTB2* is mostly expressed in the  
419 developing inflorescence, where it based on RT-PCR analyses follows a similar  
420 expression pattern when compared to *VRS5(HvTB1)*. Targeted mutagenesis of  
421 *HvTB2* resulted in spikes that lost their characteristic determinant growth  
422 pattern, and exhibited lateral branches arising from the main spike. This  
423 suggests that *HvTB2*, in contrast to its rice homologue, acts as branching

424 inhibitor rather than as inducer. In line with this, our phenotypic analysis showed  
425 that *hvtb2* mutants exhibited an increased tiller number when compared to the  
426 wild type cv. Golden Promise, revealing a more general role as branching  
427 inhibitor. In this respect, HvTB2 does not appear to act antagonistically to  
428 HvTB1 on tiller development.

429 Haplotype analysis indicates that *HvTB2* is highly conserved in barley.  
430 Considering the phenotype of *hvtb2* it is highly tempting to speculate that  
431 *HvTB2* was under selection to maintain spike architecture. The function of  
432 *TaTCP24*, which is phylogenetically closely related to HvTB2 and also  
433 expressed in developing spikes(49), remains to be elucidated. Taken together,  
434 although *BAD1*, *OsTB2* and *HvTB2* are phylogenetically closely related, they  
435 seem to exhibit functional diversity.

436 RNA *in situ* hybridization shows that *HvTB2* mRNA is localizes at spikelet  
437 meristem boundaries. This result, combined with the presence of fused seeds  
438 in the generated CRISPR- *hvtb2* knockouts, suggests that HvTB2 plays a role  
439 in the specification of the spikelet meristem boundaries. Recently, two  
440 independent manuscripts were published while this work was under  
441 preparation(50,51). In the first one, published by Shang et al. (2020)(51), the  
442 *BDI1* locus was mapped, and the underlying gene corresponded to *HvTB2*. In  
443 this work, a significant upregulation of both *SPL8-like* and *HvTB2* was observed  
444 in the *vrs4* mutants, while in *hvtb2(bdi1)* *SPL8* was significantly downregulated  
445 at the awn primordium stage. Our RT-PCR analysis also shows that *HvSPL8-*  
446 *like* was significantly downregulated in the *hvtb2* mutants. This suggest that  
447 *HvTB2* acts upstream of *SPL8-like*, similar to maize *ZmBAD1(WAB1)* pointing  
448 to a conserved mechanism at the molecular level. In a second manuscript,

449 published by Poursarebani *et al* (2020), it was shown that *HvTB2* is the causal  
450 gene underlying the *com1* and *int-h* locus, which is corroborated by our  
451 analysis. Previously, it was demonstrated that *VRS5(HvTB1)* acts downstream  
452 of *VRS4(HvRa2)*, a key regulator of row-type which promotes spikelet and floret  
453 determinacy(25,33,52). In maize, RA2 acts upstream of *ZmBAD1*, which is  
454 phylogenetically closely related to *HvTB2*. Like *HvTB2*, *VRS4(HvRa2)*  
455 transcript is located in the boundary region(52). Poursarebani *et al*(50), placed  
456 *HvTB2* downstream of *VRS4(HvRA2)* and showed a down regulation of *HvTB2*  
457 in *vrs4.k* at the double ridge and AP/LP stage. This suggests that *VRS4* acts  
458 upstream of both *VRS5(HvTB1)* and *HvTB2*, at least in regulating inflorescence  
459 architecture. Functional *VRS4(HvRa2)* prevents the outgrowth of lateral florets  
460 through activating *VRS5(HvTB1)* and *VRS1(HvHOX1)*, the latter is a well-  
461 known conserved inhibitor of lateral floret development(53). As such, *vrs1*, *vrs4*  
462 and *vrs5* single mutants display a six-rowed (*vrs1*, *vrs4*), or intermediate (*vrs5*),  
463 phenotype where lateral florets are developed(5,24,25,52,53). Both *VRS4* and  
464 *VRS5* act on lateral floret development trough modulating *VRS1*  
465 expression(24,25). In addition to this, *vrs4* mutants show similar to *hvtb2* an  
466 outgrowth of lateral branches(25,52). In this respect, it is interesting to note that  
467 *hvtb2* did not display an obvious six-rowed phenotype. In line with this, our RT-  
468 PCR analysis showed that *VRS1(HvHOX1)* expression was not significantly  
469 altered in the *hvtb2* mutants. Taken together, we propose that *VRS4(HvRA2)*  
470 acts upstream of *VRS5(HvTB1)* and *HvTB2* in supressing the outgrowth of  
471 respectively lateral florets and branches in the main inflorescence.

472 In conclusion, our analysis and two additional recently published independent  
473 studies(50,54) have shown the essential role of HvTB2 in maintaining the  
474 characteristic unbranched barley spike.

475

## 476 **Material and Methods**

477

### 478 **Phylogenetic analysis**

479 Sequences of Rice, Maize and Arabidopsis TCP TF were downloaded again  
480 from the iTAK(26) (<http://itak.feilab.net/>) and GRASSIUS(27)  
481 ([www.grassius.org](http://www.grassius.org)) databases and manually curated for missing TCPs. The  
482 barley TCPs were also downloaded from there and checked for missing  
483 sequences through a BLAST search against the barley genome using the IPK  
484 ViroBLAST (<https://webblast.ipk-gatersleben.de/>) (55,56). Protein sequences  
485 were aligned using MUSCLE (Edgar, 2004) in MEGA version 7. Exome number  
486 for barley, wheat and rice were extracted from ENSEMBLE plants. In case of  
487 splice variants only one sequence was retained.

488 To identify homologs of HvTB2, we performed a blastp search using the protein  
489 sequence as query in the Phytozome database  
490 (<https://phytozome.jgi.doe.gov/>)(57) against peptide sequences from following  
491 species: *Arabidopsis thaliana*, *Brachypodium distachyon*, *Carica papaya*,  
492 *Cucumis sativus*, *Hordeum vulgare*, *Medicago truncatula*, *Oryza sativa*,  
493 *Populus trichocarpa*, *Ricinus communis*, *Sorghum bicolor*, *Solanum*  
494 *lycopersicum*, *Triticum aestivum*, *Vitis vinifera*, and *Zea mays*. BLAST results  
495 were filtered with an E-value cutoff of 1E-10. The phylogenetic tree of HvTB2  
496 homologues was rooted by using *Selaginella moellendorffii* homolog as an  
497 outgroup.

498 Sequences were aligned using MUSCLE(58) in MEGA version 7(59) .A  
499 maximum likelihood phylogenetic tree was constructed using RAxML(60), using  
500 autoMRE for assessing convergence during bootstrapping. For the  
501 phylogenetic tree on all TCPs and the HvTB2 homologues only the  
502 convergence test was met after 50 and 100 replicates, respectively. The  
503 resulting phylogenetic trees were visualized in EMBL iTOL v4(61).

504

### 505 **Haplotype analysis**

506 Haplotype analysis was performed as described previously(34), using a set of  
507 39 research/breeding lines, 137 landraces and 91 wild barley accessions  
508 published in Russell et al. (2016)(39). Further exploration of the natural  
509 variation was performed by including the WHEALBI dataset (Whealbi), for  
510 which only the SNP matrixes are publicly available(38).

511

### 512 **Construction of the yeast-two-hybrid libraries and protein-protein** 513 **interaction studies**

514 Barley seedlings, cv. Golden Promise, were grown in controlled greenhouse  
515 conditions under long day (LD) conditions (16h, 22°C day; 8h, 18°C night).  
516 Samples were taken two hours before the end of the light period to maximize  
517 the expression of genes involved in floral organ development and flowering  
518 time. The developing seedlings were grown in 96- well trays, and fertilized when  
519 necessary. Before sampling the development of the main shoot apex (MSA)  
520 was scored according to the quantitative scale by Waddington et al. (1983).  
521 This scale is based on the progression of the most advanced floret primordium  
522 and carpel of the inflorescence. The reproductive MSA is specified by the

523 appearance of the first floret primordia referred to as the double ridge stage  
524 (W1.5-W2.0). Subsequently, the first lemma primordium occur (W3.0) followed  
525 by the stamen primordium stage (W3.5), which is characterized by the  
526 differentiation of the first floral organ primordia and the stem elongation. The  
527 induction of floral organ primordia continues until the awn primordium stage  
528 (W5.0). The last stage sampled for the library was W6.0, at this stage the stylar  
529 channels are closing. For each stage (W0-W5), at least 10 MSA in three  
530 independent biological replicates were pooled. Two Y2H screening libraries  
531 were generated one for the early developmental stages (W0-W1.5) and one for  
532 the late developmental stages (W2.0-W6). These stages have been selected  
533 as VRS5 is mainly expressed in the developing shoot apex. All MSA harvested  
534 for RNA extraction were frozen immediately in liquid nitrogen and stored at  
535  $-80^{\circ}\text{C}$ . RNA was isolated as described previously(33). Libraries were  
536 constructed using the CloneMiner™II kit, according to manufacturer's protocol  
537 One exception was the propagation of the libraries in E.coli, which was done  
538 on large 150 mm in diameter petri dishes instead of liquid medium. The  
539 pDEST22 vector was used as prey vector, and thus the destination vector for  
540 the libraries. The resulting libraries contained a titer of  $8.87 \times 10^6$  and  $1.73 \times$   
541  $10^6$  CFU. The variation of the genes in these libraries has been tested by colony  
542 PCR followed by sequencing of the PCR amplicon.

543 Primers targeting the TCP transcription factors used in the yeast-two hybrid  
544 screen are listed in Supplemental Table S6. The corresponding TCPs were  
545 amplified using Q5® High-Fidelity DNA Polymerase (New England Biolabs)  
546 from the cDNA screening library and cloned into pDONR201. For  
547 VRS5(HvTB1) the HvTB1-a and HvTB1-b alleles were amplified from cDNA of

548 respectively, cv. Morex and cv. Bowman. Subsequently, the TCP TF were  
549 cloned into the bait (pDEST32) and prey (pDEST22) vectors. To prevent auto  
550 activation in the bait constructs (pDEST32) the N-terminal part of the full length  
551 TB1 protein was removed (VRS5(HvTB1<sup>NtDEL83</sup>)). The TCP domain was kept  
552 intact for all construct used. Autoactivation was tested on selective medium  
553 containing -L + 3AT and -LA. Only the -LA marker showed no autoactivation  
554 (S4A Figure), and therefore the screen was performed using -LWA medium. As  
555 negative control, HORVU.MOREX.r2.3HG0240550 was included, which is  
556 annotated as a transcriptional regulator without known domains. As positive  
557 control, all plates were grown on media containing -LW in parallel to the  
558 selective -LWA plates. For the heterologous screen against the Arabidopsis TF  
559 library (32), VRS5(HvTB1<sup>NtDEL83</sup>) was used as bait and the library as prey.  
560 Subsequently, the screen was performed on -LWA medium using medium  
561 containing -LW as positive control, as described above.

562

### 563 **CRISPR-CAS mutagenesis**

564 For CRISPR-CAS mutagenesis OsU3 promoter, which used a “A” as start site,  
565 was used, which was linked in the Golden Gate vector system(62). In total three  
566 guides were used. guide 1: GCAGCTTCTCCATGGCGCCT; guide 2:  
567 GCTCCTCCTCTGGCGGACAT; guide 3: ACTGGCGCAGTGCAGGCCGC.  
568 Plants were transformed as described previously(63). The resulting primary  
569 transformants were selected for presence of CAS9. In the second generation,  
570 two lines were selected based on mutational events. Transformants were  
571 genotyped using the Phire Plant Direct PCR Kit (Thermo Fisher Scientific),

572 amplified fragments were directly sequenced. Primers for genotyping the  
573 generated mutants are added in Supplemental Table S6.

574

### 575 **Plant growth and phenotyping**

576 For plant phenotyping between cv Golden Promise (GP) and *hvtb2* mutants  
577 plants were grown on soil at 22°C during the day (light, 16 hours) and 16°C  
578 during the night (in darkness, 8 hours) in 1 L pots supplied with fertilizer and  
579 water when needed. Tiller number was recorded at full maturity. Thousand  
580 grain weight (TGW), grain number per spike and size were recorded after drying  
581 of the spike/seeds. Statistical analyses were performed using the statistical  
582 software R (<http://www.r-project.org/>) Differences between wild type and  
583 mutant genotypes were determined using a student's t-test or a one-way  
584 ANOVA combined with a Tukey HSD for multiple comparison

585

### 586 **RNA *in-situ* hybridization, EM microscopy and RT-PCR analysis**

587 Plants were grown on soil at 22°C during the day (light, 16 hours) and 16°C  
588 during the night (in darkness, 8 hours) in small 40-well trays. Probes for HvTB2  
589 mRNA were prepared from the whole coding sequence (start to stop codon).  
590 Cloning and RNA probe synthesis was performed as described Kirschner et al.  
591 (2017)(64) and used as full-length RNA probes or with a subsequent  
592 hydrolysis to 150 bp. RNA in situ hybridizations on shoot apical meristems  
593 of the double ridge stage (and the awn primordium stage were performed as  
594 described before(64).

595 For scanning electron microscopy, dissected main inflorescences were  
596 mounted on a copper specimen holder with freeze hardening glue and frozen



597 in liquid nitrogen. Images were obtained using a FEI Magellan 400 microscope,  
598 which is equipped with a Leica cold stage for cryo-microscopy. Low-  
599 temperature SEM was performed on the frozen shoot apical meristems. Images  
600 of *hvtb2-1* and *hvtb2-2* were processed using Adobe Photoshop to colour code  
601 the outgrowing side shoots. Staging of the apex over development was done  
602 using a standard binocular microscope. For RT-PCR and monitoring the shoot  
603 apex development, plants were grown in 96-well trays, under controlled  
604 greenhouse conditions as described above. Leaf-enriched developing  
605 inflorescences were collected lemma and stamen and awn primordium stages.  
606 RNA-isolation for RT-PCR analysis was done using the PureYield™ RNA kit  
607 (Promega). For expression analysis of HvTB2 in *vrs4* background the *vrs4.k*  
608 mutant (GSHO 1986), which is a near isogenic line in cv. Bowman. All RT-PCR  
609 experiments were done in at least three biological replicates. Statistical  
610 differences were calculated using a two-tailed unpaired Student's t test. Primers  
611 for RT-PCR analysis are included in Supplemental Table S6.

## 612 **Acknowledgments**

613 We cordially thank: Rients Niks for sharing greenhouse space; Marcel  
614 Giesbers, for generating the EM images of the barley apex; Agatha Walla for  
615 assistance in the haplotype analysis; Steven Groot for making pictures wild type  
616 and mutant seeds, awns and spikes; and Martijn Wiekens for technical  
617 assistance in generating the Y2H libraries during his BSc thesis work; and Peter  
618 van Esse and Mark Youles for sharing vectors used for CRISPR-CAS  
619 mutagenesis. This work has been financially supported by the Gatsby  
620 Foundation (MJM) and VENI (WvE, project number 15060) .

621

622 **Figure Captions**

623

624

625 **Fig 1. Phylogenetic relationships and sequence conservation of barley**

626 **TCP transcription factors.** (A) Maximum likelihood phylogenetic tree of TCP

627 transcription factors from barley, wheat, rice, maize and Arabidopsis. (B) Amino

628 acid sequence alignments of the TCP domain of barley TCPs. A gray

629 background indicates a high similarity in the conserved TCP domain,

630 independent of class I or II; green blue and yellow background indicates

631 conserved amino acids corresponding to the TB1/CYC, CIN and class I clade,

632 respectively. Purple indicates the two TCPs HvTB2 and HvTB15, which are

633 most closely related to BAD1 according to the phylogenetic analysis.

634

635 **Fig 2: Protein-protein interaction and gene expression of barley TCP**

636 **transcription factors in the TB1-clade and CIN-clade.** (A) Protein-protein

637 interactions were scored on the medium lacking leucine (L), tryptophan (W) and

638 adenine (A), medium lacking L and W was used as positive control for the

639 mating. As negative control (neg.) a barley gene annotated as TF with unknown

640 function was used as prey. For the bait vector, N-terminal deletion constructs

641 of VRS5(HvTB1), HvTB1-like and HvTB2 were used. (B) Expression of TCPs

642 that interact with VRS5(HvTB1) based on transcript per million (TPM). For each

643 RNA-Seq library three independent replicates extracted from GSE102191(33)

644 and GSE149110(34) were re-analysed. DR= double ridge stage; LP/SP is the

645 lemma and stamen primordia stage; AP is the awn primordium stage.

646

647 **Fig 3. Macroscopic phenotype of HvTB2 mutants.** (A) CRISPR-CAS9 target

648 site and *hvtb2* mutants generated. Trace files show the sequence of cv. Golden

649 Promise (GP) in comparison the 57bp deletion mutant, *hvtb2-1* and the 184 bp  
650 insertion mutant *hvtb2-2*. (B) Spike phenotype of the wild-type GP in  
651 comparison to the generated *hvtb2-1* and *hvtb2-2* mutants. Right corner inset  
652 shows an enlarged image of the seeds, with clear split of the awn and fused  
653 seeds which is observed in both mutants. (C-E) Spike length, thousand grain  
654 weight (TGW) and tiller number measurements of GP, *hvtb2-1* and *hvtb2-2*. Per  
655 genotype: spike length n=18 spikes; for tiller number n= 12 plants. TGW is  
656 based on extrapolation of the weight of 15 seeds, n= 20 pools. Different letters  
657 indicate experimental groups that were significantly based on a one-way  
658 ANOVA ( $P \leq 0.05$ ), same letters indicate not significant under this criterium.

659

660 **Fig 4. Meristem phenotype of *hvtb2* mutants.** (A) Scanning electron  
661 microscope images taken at the lemma and stamen primordia stages (LP/SP)  
662 . Pink color indicates the outgrowing branch structure in the developing  
663 meristem. CS = central spikelet meristem; LS= lateral spikelet meristem; C=  
664 colar; L=leaf. (B) RNA *in-situ* hybridization of *HvTB2* in the background of  
665 cvBowman. Squares in panel are enhanced images in the defined region. (C)  
666 RT-PCR analysis of the VRS genes, TB2 and SPL8 in *hvtb2-1* and *hvtb2-2*  
667 compared to the wild type cv Golden Promise (GP) at the LP/SP and AP.  
668 Statistical differences between the  $\Delta\Delta CT$  values was calculated using a t-test  
669 using a p-value of 0.05 as the threshold. Asterisks indicate significant  
670 differences when compared to GP. For all datapoints  $n \geq 3$  biological replicates.

671

672 **Fig. 5. Haplotype analysis of *HvTB2*.** Haplotype analysis is done on SNPs  
673 present in 607 individual plant lines ranging from wild barley (spontaneum),  
674 landraces and cultivars with 2-rowed or six-rowed spike architecture. Number

675 of plants per haplotype is indicated between brackets, SNPs identified and  
676 changes that occur at the amino acid level are stated below the haplotype.

677

678

679 **Supporting information captions**

680

681 **S1 Fig. Genomic organization of the TCP TF gene family in barley.** Red

682 boxes represent coding exons, white boxes exons and lines represent introns.

683 Wheat and rice TCPs that have a different genomic organization when

684 compared to barley are highlighted in blue.

685

686 **S2 Fig.** Maximum likelihood phylogenetic tree of *HvTB2-like* genes in 19

687 monocot and eudicot plant species. Tree was build using the protein

688 sequences. The sequence of a TCP homolog obtained from *Selaginella*

689 *moellendorffii* (transcript ID 89227) was used for rooting. The barley *HvTB2*

690 gene described in this study, *HvTB2*, is highlighted in red. Functionally

691 characterized genes within the same clade are marked in blue. Arabidopsis

692 class II TCPs in the eudicot branched are marked in green. Bootstrap support

693 (%) is shown at the nodes. Abbreviated species names are given before gene

694 identifiers. Aet: *Aegilops tauschii*; Ath: *Arabidopsis thaliana*; Bd: *Brachypodium*

695 *distachyon*; Cp: *Carica papaya*; Cs: *Cucumis sativus*; Hv: *Hordeum vulgare*;

696 Mt: *Medicago truncatula*; Os: *Oryza sativa*; Pt: *Populus trichocarpa*; Pv:

697 *Phaseolus vulgaris*; Rc: *Ricinus communis*; Sb: *Sorghum bicolor*; Sc: *Secale*

698 *cereale*; Si: *Setaria italica*; Sl: *Solanum lycopersicum*; Ta: *Triticum aestivum*;

699 Vv: *Vitis vinifera*; Zm: *Zea mays*. Scale bar = 0.1 substitutions per site.

700

701 **S3 Fig. Barley apex and crown tissue used isolated to generate yeast-two-**

702 **hybrid libraries.** Main shoot apex (MSA) and crown tissue of developing barley

703 seedlings was excised at different developmental stages. Library 1 was made

704 from crown tissue including the vegetative apical meristem. Library 2 was made  
705 from shoot apical meristem tissue obtained during various stages of floral organ  
706 development, starting at the floral transition which is marked by the double ridge.  
707 The last samples for library 2 were taken after the induction of floral organ  
708 primordia was completed. Random PCR amplification of the inserts present in  
709 several independent colonies. indicated that the libraries include cDNA  
710 fragments between 500-2000 bp. Sequencing of 10 colonies verified that there  
711 was a good variation in the identified proteins.

712

713 **S4 Fig. Detailed overview of yeast-two-hybrid protein-protein**  
714 **interactions.** (A) Table showing the results of the autoactivation test. For each  
715 construct at least three colonies were scored. (B) Number of replicates  
716 performed in the protein-protein interaction studies (top panel), compared to the  
717 number of interactions observed (middle and bottom panel). Each interaction  
718 was scored in at least 6 independent replicates. Differences between replicates  
719 are visualized by dividing the interactions scored by the number of replicates  
720 with: a score of 0 (yellow) no interaction; and a score of 1 (dark green) always  
721 an interaction; values in-between 0-1 indicate the constancy of the results  
722 between replicates.

723

724 **S5 Fig. Target region for CRISPR-CAS mutagenesis of *HvTB2*.** Black bars  
725 mark the three guides, red triangles the NGG PAM recognition site. The orange  
726 block shows the TCP domain.

727

728 **S6 Fig. Quantification of the *hvtb2* spike phenotype.** Seeds per rachis  
729 internode on each side of the spike are indicated in green. GP did not contain  
730 any lateral spikelets (gray) nor lateral branches while in *hvtb2* most of the basal  
731 lateral spikelets are developed into seeds (pink). Purple blocks indicate  
732 branches occurring at the rachis node. C indicates central spikelet, L indicate  
733 lateral spikelets.

734

735 **S7 Fig. Phenotypical analysis of the *hvtb2* mutant.** (A) Original images used  
736 to generate the subpanel 3B. Three representative seeds with awn were  
737 selected to visualize the difference in awn architecture for seeds on the basal  
738 part of *hvtb2* mutants when compared to the wildtype cv. Golden Promise (GP).  
739 (B) Phenotype of *hvtb2* compared to GP, seeds are removed for better  
740 visualization of the branches. (C) Number of grains per spike, n= 9 spikes; D-  
741 F) Seed parameters TGW (n=20); grain width (n=30; and grain length (n=30).  
742 In the *hvtb2* mutants the central and lateral seeds were measured separately.  
743 Statistical differences are based on a one-way ANOVA, combined with a  
744 combined with a Tukey HSD for multiple comparison. Letters indicate  
745 differences when compared to GP using a;  $P \leq 0.05$ .

746

747 **S8 Fig. Genotyping *int-h* and *com1*.** (A) Table showing the PCR amplification  
748 results of *int-h* and *com1* lines. Green marks regions where a PCR amplicon  
749 was obtained, gray indicates no amplicon. Top panel shows the regions that  
750 were targeted in the PCR analysis: promoter region of *HvTB2* (dark green),  
751 coding sequence (blue) and downstream region (orange). Up to a region of  
752 2,500 base pairs upstream of the start and 7050 bp downstream of the start no

753 PCR amplicon was obtained in *int-h.42*, *int-h.43* and *int-h.44* as well as *com1.a*  
754 and *com1.b*. Primers used in the assay are included in Supplemental Table S6.  
755 (B) *int-h.83* and *com1.c* contained a non-synonymous polymorphism within the  
756 conserved TCP domain (black box) which was not present in the wild type  
757 control nor identified as common haplotype. (C) PROVEAN score, which  
758 predicts whether an amino acid substitution or indel has an impact on the  
759 biological function of a protein indicates that there is no effect of the observed  
760 haplotypes HAP2, 7 and 8 while the SNPs in *int-h83* and *com1.c* are predicted  
761 to have deleterious effects.

762

763 **.S9 Fig. Shoot apical meristem development of *hvtb2-1* compared to cv.**  
764 **Golden Promise.** (A) development of the shoot apex of wildtype and *hvtb2-1*  
765 mutant. At double ridge stage no differences were observed while at awn  
766 primordium stage a clear outgrowth of the lateral branch is observed. (B) Shoot  
767 apical meristem development of cv Golden Promise (GP) versus *hvtb2-1*,  
768 monitored using the Waddington scale (W). (C) leaf number of *hvtb2-1*  
769 compared to the wildtype GP. For both (B) and (C)  $n \geq 6$  plants. No significant  
770 differences were observed.

771

772 **S10 Fig. In-situ hybridization in cvBowman targeting HvTB2.** The RNA *in-*  
773 *situ* hybridization was performed at the double ridge stage, (A) and the awn  
774 primordium stage (B). The first two images in panel B show the original  
775 compiled images used for figure 4B, whereas the third image shows the same  
776 tissue but a different sectioning depth.

777



778 **S11 Fig. Haplotype analysis of *HvTB1*.** (A) Haplotype network of  
779 *VRS5(HvTB1)* comprising elite, landrace and wild barley lines. In total  
780 sequences of 670 different genotypes were included in the analysis. The two  
781 major haplotypes observed HAP1 and HAP2 give a clear distinct between two-  
782 rowed and 6-rowed architecture signifying the selective advantage of these  
783 haplotypes for specific backgrounds. (B) Representation of the two main  
784 *VRS5(HvTB1)* haplotypes corresponding to the 2-rowed and 6-rowed cultivars.  
785 (C) PROVEAN score, which predicts whether an amino acid substitution or  
786 indel has an impact on the biological function of a protein indicates that there is  
787 no effect of the observed haplotypes.

788

789 **S1 Table** Genomic location of TCP transcription factors in barley

790 **S2 Table** Gene names and identifiers used to construct the TCP phylogenetic  
791 tree (Figure 1)

792 **S3 Table** Screen of *HvTB1* protein against a Y2H screening library in yeast

793 **S4 Table** Expression of TCP transcription factors used in the Y2H screen in the  
794 developing shoot apex

795 **S5 Table** Measured phenotypical data for wildtype Golden Promise, *hvtb2-1*  
796 and *hvtb2-2*

797 **S6 Table** Primers used in this study

798

799

## 800 Literature

- 801 1. Doebley J, Stec A, Hubbard L. The evolution of apical dominance in maize. *Nature*  
802 [Internet]. 1997 Apr 3 [cited 2020 Sep 19];386(6624):485–8. Available from:  
803 <https://www.nature.com/articles/386485a0>  
804 2. Hubbard L, McSteen P, Doebley J, Hake S. Expression patterns and mutant  
805 phenotype of teosinte branched1 correlate with growth suppression in maize and  
806 teosinte. *Genetics* [Internet]. 2002 Dec [cited 2019 Jul 25];162(4):1927–35.

- 807 Available from: <http://www.ncbi.nlm.nih.gov/pubmed/12524360>
- 808 3. Dixon LE, Greenwood JR, Bencivenga S, Zhang P, Cockram J, Mellers G, et al.
- 809 TEOSINTE BRANCHED1 Regulates Inflorescence Architecture and Development in
- 810 Bread Wheat (*Triticum aestivum*). *Plant Cell* [Internet]. 2018 [cited 2019 Jul
- 811 25];30(3):563–81. Available from:
- 812 <http://www.ncbi.nlm.nih.gov/pubmed/29444813>
- 813 4. Takeda T, Suwa Y, Suzuki M, Kitano H, Ueguchi-Tanaka M, Ashikari M, et al. The
- 814 OsTB1 gene negatively regulates lateral branching in rice. *Plant J* [Internet]. 2003
- 815 Feb [cited 2019 Jul 25];33(3):513–20. Available from:
- 816 <http://www.ncbi.nlm.nih.gov/pubmed/12581309>
- 817 5. Ramsay L, Comadran J, Druka A, Marshall DF, Thomas WTB, Macaulay M, et al.
- 818 INTERMEDIUM-C, a modifier of lateral spikelet fertility in barley, is an ortholog of
- 819 the maize domestication gene TEOSINTE BRANCHED 1. *Nat Genet* [Internet]. 2011
- 820 Feb [cited 2019 Jul 25];43(2):169–72. Available from:
- 821 <http://www.ncbi.nlm.nih.gov/pubmed/21217754>
- 822 6. Nicolas M, Rodríguez-Buey ML, Franco-Zorrilla JM, Cubas P. A Recently Evolved
- 823 Alternative Splice Site in the BRANCHED1a Gene Controls Potato Plant Architecture.
- 824 *Curr Biol*. 2015 Jul 20;25(14):1799–809.
- 825 7. Braun N, Germain A de Saint, Pillot JP, Boutet-Mercey S, Dalmais M, Antoniadi I, et
- 826 al. The pea TCP transcription factor PsBRC1 acts downstream of strigolactones to
- 827 control shoot branching. *Plant Physiol* [Internet]. 2012 Jan 1 [cited 2020 Sep
- 828 19];158(1):225–38. Available from:
- 829 [www.plantphysiol.org/cgi/doi/10.1104/pp.111.182725](http://www.plantphysiol.org/cgi/doi/10.1104/pp.111.182725)
- 830 8. Kosugi S, Ohashi Y. PCF1 and PCF2 specifically bind to cis elements in the rice
- 831 proliferating cell nuclear antigen gene. *Plant Cell* [Internet]. 1997 Sep 1 [cited 2020
- 832 Sep 19];9(9):1607–19. Available from: <http://www.plantcell.org/content/9/9/1607>
- 833 9. Luo D, Carpenter R, Vincent C, Copsey L, Coen E. Origin of floral asymmetry in
- 834 *Antirrhinum*. *Nature* [Internet]. 1996 Oct 31 [cited 2021 Jan 17];383(6603):794–9.
- 835 Available from: <https://www.nature.com/articles/383794a0>
- 836 10. Cubas P, Lauter N, Doebley J, Coen E. The TCP domain: A motif found in proteins
- 837 regulating plant growth and development. *Plant J* [Internet]. 1999 Apr 1 [cited
- 838 2020 Sep 19];18(2):215–22. Available from:
- 839 <https://onlinelibrary.wiley.com/doi/full/10.1046/j.1365-3113.1999.00444.x>
- 840 11. Yuan Z, Gao S, Xue DW, Luo D, Li LT, Ding SY, et al. Retarded Palea1 controls
- 841 palea development and floral zygomorphy in rice. *Plant Physiol* [Internet]. 2009 Jan
- 842 [cited 2020 Sep 19];149(1):235–44. Available from:
- 843 <https://pubmed.ncbi.nlm.nih.gov/18952859/>
- 844 12. Lyu J, Huang L, Zhang S, Zhang Y, He W, Zeng P, et al. Neo-functionalization of a
- 845 Teosinte branched 1 homologue mediates adaptations of upland rice. *Nat Commun*
- 846 [Internet]. 2020 Dec 1 [cited 2020 Sep 19];11(1):1–13. Available from:
- 847 <https://doi.org/10.1038/s41467-019-14264-1>
- 848 13. Wang S, Yang X, Xu M, Lin X, Lin T, Qi J, et al. A Rare SNP Identified a TCP
- 849 Transcription Factor Essential for Tendril Development in Cucumber. *Mol Plant*.
- 850 2015 Dec 7;8(12):1795–808.
- 851 14. Bai F, Reinheimer R, Durantini D, Kellogg EA, Schmidt RJ. TCP transcription factor,
- 852 BRANCH ANGLE DEFECTIVE 1 (BAD1), is required for normal tassel branch angle
- 853 formation in maize. *Proc Natl Acad Sci U S A* [Internet]. 2012 Jul 24 [cited 2020
- 854 Sep 19];109(30):12225–30. Available from:
- 855 [www.pnas.org/cgi/doi/10.1073/pnas.1202439109](http://www.pnas.org/cgi/doi/10.1073/pnas.1202439109)
- 856 15. Kebrom TH, Brutnell TP, Finlayson SA. Suppression of sorghum axillary bud
- 857 outgrowth by shade, phyB and defoliation signalling pathways. *Plant, Cell Environ*
- 858 [Internet]. 2010 Jan [cited 2020 Sep 19];33(1):48–58. Available from:
- 859 <https://pubmed.ncbi.nlm.nih.gov/19843258/>
- 860 16. Kebrom TH, Spielmeier W, Finnegan EJ. Grasses provide new insights into
- 861 regulation of shoot branching. *Trends Plant Sci* [Internet]. 2013 Jan [cited 2019 Jul
- 862 25];18(1):41–8. Available from: <http://www.ncbi.nlm.nih.gov/pubmed/22858267>
- 863 17. Aguilar-Martínez JA, Poza-Carrión C, Cubas P. *Arabidopsis* Branched1 acts as an
- 864 integrator of branching signals within axillary buds. *Plant Cell* [Internet]. 2007 Feb
- 865 1 [cited 2020 Sep 19];19(2):458–72. Available from:
- 866 [www.plantcell.org/cgi/doi/10.1105/tpc.106.048934](http://www.plantcell.org/cgi/doi/10.1105/tpc.106.048934)
- 867 18. Corbesier L, Vincent C, Jang S, Fornara F, Fan Q, Searle I, et al. FT protein
- 868 movement contributes to long-distance signaling in floral induction of *Arabidopsis*.
- 869 *Science* (80- ). 2007;

- 870 19. Finlayson SA. Arabidopsis TEOSINTE BRANCHED1-LIKE 1 regulates axillary bud  
871 outgrowth and is homologous to monocot TEOSINTE BRANCHED1. *Plant Cell Physiol*  
872 [Internet]. 2007 May 1 [cited 2020 Sep 19];48(5):667–77. Available from:  
873 [www.pcp.oxfordjournals.org](http://www.pcp.oxfordjournals.org)
- 874 20. Koppolu R, Schnurbusch T. Developmental pathways for shaping spike inflorescence  
875 architecture in barley and wheat. *J Integr Plant Biol* [Internet]. 2019 Mar 18 [cited  
876 2020 Sep 19];61(3):278–95. Available from:  
877 <https://onlinelibrary.wiley.com/doi/abs/10.1111/jipb.12771>
- 878 21. Boden SA, Østergaard L. How can developmental biology help feed a growing  
879 population? *Dev* [Internet]. 2019 Feb 1 [cited 2020 Sep 19];146(3). Available  
880 from: <https://dev.biologists.org/content/146/3/dev172965>
- 881 22. Gauley A, Boden SA. Genetic pathways controlling inflorescence architecture and  
882 development in wheat and barley [Internet]. Vol. 61, *Journal of Integrative Plant*  
883 *Biology*. Blackwell Publishing Ltd; 2019 [cited 2020 Sep 19]. p. 296–309. Available  
884 from: <http://www.jipb.net/EN/abstract/abstract29384.shtml>
- 885 23. Pourkheirandish M, Hensel G, Kilian B, Senthil N, Chen G, Sameri M, et al. Evolution  
886 of the Grain Dispersal System in Barley. *Cell* [Internet]. 2015 Aug 1 [cited 2021 Jan  
887 19];162(3):527–39. Available from: <http://dx.doi.org/10.1016/j.cell.2015.07.002>
- 888 24. Liller CB, Neuhaus R, Von Korff M, Koornneef M, Van Esse W. Mutations in barley  
889 row type genes have pleiotropic effects on shoot branching. *PLoS One*. 2015;
- 890 25. Zwirek M, Waugh R, McKim SM. Interaction between row-type genes in barley  
891 controls meristem determinacy and reveals novel routes to improved grain. *New*  
892 *Phytol* [Internet]. 2019 Mar [cited 2019 Jul 25];221(4):1950–65. Available from:  
893 <http://www.ncbi.nlm.nih.gov/pubmed/30339269>
- 894 26. Zheng Y, Jiao C, Sun H, Rosli HG, Pombo MA, Zhang P, et al. iTAK: A Program for  
895 Genome-wide Prediction and Classification of Plant Transcription Factors,  
896 Transcriptional Regulators, and Protein Kinases. Vol. 9, *Molecular Plant*. Cell Press;  
897 2016. p. 1667–70.
- 898 27. Gray J, Bevan M, Brutnell T, Buell CR, Cone K, Hake S, et al. A recommendation for  
899 naming transcription factor proteins in the grasses [Internet]. Vol. 149, *Plant*  
900 *Physiology*. American Society of Plant Biologists; 2009 [cited 2020 Sep 19]. p. 4–6.  
901 Available from: [www.plantphysiol.org/cgi/doi/10.1104/pp.108.128504](http://www.plantphysiol.org/cgi/doi/10.1104/pp.108.128504)
- 902 28. Zhao J, Zhai Z, Li Y, Geng S, Song G, Guan J, et al. Genome-wide identification and  
903 expression profiling of the tcp family genes in spike and grain development of  
904 wheat (*triticum aestivum* L.). *Front Plant Sci* [Internet]. 2018 Sep 10 [cited 2020 Jul  
905 27];9. Available from: [/pmc/articles/PMC6160802/?report=abstract](https://pmc/articles/PMC6160802/?report=abstract)
- 906 29. Monat C, Padmarasu S, Lux T, Wicker T, Gundlach H, Himmelbach A, et al. TRITEX:  
907 Chromosome-scale sequence assembly of Triticeae genomes with open-source  
908 tools. *Genome Biol* [Internet]. 2019 Dec 18 [cited 2020 Sep 19];20(1):284.  
909 Available from:  
910 <https://genomebiology.biomedcentral.com/articles/10.1186/s13059-019-1899-5>
- 911 30. Jiao Y, Lee YK, Gladman N, Chopra R, Christensen SA, Regulski M, et al. MSD1  
912 regulates pedicellate spikelet fertility in sorghum through the jasmonic acid  
913 pathway. *Nat Commun* [Internet]. 2018 Dec 1 [cited 2020 Sep 19];9(1):1–9.  
914 Available from: [www.ars-grin.gov](http://www.ars-grin.gov)
- 915 31. Danisman S, Van Dijk ADJ, Bimbo A, Van Der Wal F, Hennig L, De Folter S, et al.  
916 Analysis of functional redundancies within the Arabidopsis TCP transcription factor  
917 family. *J Exp Bot* [Internet]. 2013 Dec 1 [cited 2020 Sep 19];64(18):5673–85.  
918 Available from: <https://academic.oup.com/jxb/article/64/18/5673/609780>
- 919 32. Prunedo-Paz JL, Breton G, Nagel DH, Kang SE, Bonaldi K, Doherty CJ, et al. A  
920 Genome-Scale Resource for the Functional Characterization of Arabidopsis  
921 Transcription Factors. *Cell Rep* [Internet]. 2014 Jul 24 [cited 2021 Mar  
922 23];8(2):622–32. Available from: <https://pubmed.ncbi.nlm.nih.gov/25043187/>
- 923 33. van Esse GW, Walla A, Finke A, Koornneef M, Pecinka A, von Korff M. Six-Rowed  
924 Spike3 (VRS3) Is a Histone Demethylase That Controls Lateral Spikelet  
925 Development in Barley. *Plant Physiol* [Internet]. 2017 Aug [cited 2019 Jul  
926 25];174(4):2397–408. Available from:  
927 <http://www.ncbi.nlm.nih.gov/pubmed/28655778>
- 928 34. Walla A, Wilma van Esse G, Kirschner GK, Guo G, Brünje A, Finkemeier I, et al. An  
929 Acyl-CoA N-Acyltransferase Regulates Meristem Phase Change and Plant  
930 Architecture in Barley. *Plant Physiol* [Internet]. 2020 Jul 1 [cited 2020 Sep  
931 19];183(3):1088–109. Available from:  
932 [www.plantphysiol.org/cgi/doi/10.1104/pp.20.00087](http://www.plantphysiol.org/cgi/doi/10.1104/pp.20.00087)

- 933 35. Druka A, Franckowiak J, Lundqvist U, Bonar N, Alexander J, Houston K, et al.  
934 Genetic Dissection of Barley Morphology and Development. *Plant Physiol.* 2011;  
935 36. Newsletter B genetics. Barley Genetic Stocks Database [Internet]. [cited 2020 Dec  
936 23]. Available from:  
937 [https://www.nordgen.org/bgs/index.php?pg=bgs\\_show&docid=434](https://www.nordgen.org/bgs/index.php?pg=bgs_show&docid=434)  
938 37. Tripathi RK, Bregitzer P, Singh J. Genome-wide analysis of the SPL/miR156 module  
939 and its interaction with the AP2/miR172 unit in barley. *Sci Rep* [Internet]. 2018 Dec  
940 1 [cited 2020 Oct 7];8(1):7085. Available from: [www.nature.com/scientificreports/](http://www.nature.com/scientificreports/)  
941 38. Bustos-Korts D, Dawson IK, Russell J, Tondelli A, Guerra D, Ferrandi C, et al. Exome  
942 sequences and multi-environment field trials elucidate the genetic basis of  
943 adaptation in barley. *Plant J.* 2019;  
944 39. Russell J, Mascher M, Dawson IK, Kyriakidis S, Calixto C, Freund F, et al. Exome  
945 sequencing of geographically diverse barley landraces and wild relatives gives  
946 insights into environmental adaptation. *Nat Genet* [Internet]. 2016 Sep 1 [cited  
947 2020 Sep 20];48(9):1024–30. Available from:  
948 <https://pubmed.ncbi.nlm.nih.gov/27428750/>  
949 40. Danisman S. TCP transcription factors at the interface between environmental  
950 challenges and the plant's growth responses [Internet]. Vol. 7, *Frontiers in Plant*  
951 *Science*. Frontiers Media S.A.; 2016 [cited 2020 Sep 19]. Available from:  
952 [/pmc/articles/PMC5174091/?report=abstract](https://pmc/articles/PMC5174091/?report=abstract)  
953 41. Navaud O, Dabos P, Carnus E, Tremousaygue D, Hervé C. TCP transcription factors  
954 predate the emergence of land plants. *J Mol Evol* [Internet]. 2007 Jul [cited 2021  
955 Jan 18];65(1):23–33. Available from: <https://pubmed.ncbi.nlm.nih.gov/17568984/>  
956 42. Bemer M, van Dijk ADJ, Immink RGH, Angenent GC. Cross-Family Transcription  
957 Factor Interactions: An Additional Layer of Gene Regulation [Internet]. Vol. 22,  
958 *Trends in Plant Science*. Elsevier Ltd; 2017 [cited 2021 Feb 26]. p. 66–80. Available  
959 from: <http://www.cell.com/article/S1360138516301662/fulltext>  
960 43. Efroni I, Han S-K, Kim HJ, Wu M-F, Steiner E, Birnbaum KD, et al. Regulation of leaf  
961 maturation by chromatin-mediated modulation of cytokinin responses. *Dev Cell*  
962 [Internet]. 2013 Feb 25 [cited 2019 Oct 30];24(4):438–45. Available from:  
963 <http://www.ncbi.nlm.nih.gov/pubmed/23449474>  
964 44. Sarvepalli K, Nath U. CIN-TCP transcription factors: Transiting cell proliferation in  
965 plants. *IUBMB Life* [Internet]. 2018 Aug 1 [cited 2021 Mar 1];70(8):718–31.  
966 Available from: <http://doi.wiley.com/10.1002/iub.1874>  
967 45. Trigg SA, Garza RM, MacWilliams A, Nery JR, Bartlett A, Castanon R, et al. CrY2H-  
968 seq: A massively multiplexed assay for deep-coverage interactome mapping. *Nat*  
969 *Methods* [Internet]. 2017 Jul 28 [cited 2021 Jan 7];14(8):819–25. Available from:  
970 <https://www.nature.com/articles/nmeth.4343>  
971 46. Petroni K, Kumimoto RW, Gnesutta N, Calvenzani V, Fornari M, Tonelli C, et al. The  
972 promiscuous life of plant NUCLEAR FACTOR Y transcription factors. Vol. 24, *Plant*  
973 *Cell*. 2013. p. 4777–92.  
974 47. Martín-Trillo M, Cubas P. TCP genes: a family snapshot ten years later. Vol. 15,  
975 *Trends in Plant Science*. 2010. p. 31–9.  
976 48. Lewis MW, Bolduc N, Hake K, Htike Y, Hay A, Candela HH, et al. Gene regulatory  
977 interactions at lateral organ boundaries in maize. 2014;  
978 49. Zhao J, Zhai Z, Li Y, Geng S, Song G, Guan J, et al. Genome-wide identification and  
979 expression profiling of the tcp family genes in spike and grain development of  
980 wheat (*triticum aestivum* L.). *Front Plant Sci* [Internet]. 2018 Sep 10 [cited 2020  
981 Sep 19];9. Available from: [/pmc/articles/PMC6160802/?report=abstract](https://pmc/articles/PMC6160802/?report=abstract)  
982 50. Poursarebani N, Trautewig C, Melzer M, Nussbaumer T, Lundqvist U, Rutten T, et al.  
983 COMPOSITUM 1 contributes to the architectural simplification of barley inflorescence  
984 via meristem identity signals. *Nat Commun* [Internet]. 2020 Dec 1 [cited 2021 Jan  
985 7];11(1):1–16. Available from: <https://doi.org/10.1038/s41467-020-18890-y>  
986 51. Shang Y, Yuan L, Di Z, Jia Y, Zhang Z, Li S, et al. A CYC/TB1 type TCP transcription  
987 factor controls spikelet meristem identity in barley (*Hordeum vulgare* L.). *J Exp Bot*  
988 [Internet]. 2020 Sep 11 [cited 2020 Sep 21]; Available from:  
989 <https://academic.oup.com/jxb/advance-article/doi/10.1093/jxb/eraa416/5904211>  
990 52. Koppolu R, Anwar N, Sakuma S, Tagiri A, Lundqvist U, Pourkheirandish M, et al.  
991 Six-rowed spike4 (Vrs4) controls spikelet determinacy and row-type in barley. *Proc*  
992 *Natl Acad Sci.* 2013;  
993 53. Komatsuda T, Pourkheirandish M, He C, Azhaguvel P, Kanamori H, Perovic D, et al.  
994 Six-rowed barley originated from a mutation in a homeodomain-leucine zipper I-  
995 class homeobox gene. *Proc Natl Acad Sci.* 2007;

- 996 54. Poursarebani N, Seidensticker T, Koppolu R, Trautewig C, Gawroński P, Bini F, et al.  
997 The genetic basis of composite spike form in barley and 'miracle-wheat.' *Genetics*.  
998 2015;
- 999 55. Mascher M, Gundlach H, Himmelbach A, Beier S, Twardziok SO, Wicker T, et al. A  
1000 chromosome conformation capture ordered sequence of the barley genome. *Nature*.  
1001 2017 Apr 26;544(7651):427–33.
- 1002 56. Deng W, Nickle DC, Learn GH, Maust B, Mullins JI. ViroBLAST: a stand-alone BLAST  
1003 web server for flexible queries of multiple databases and user's datasets.  
1004 *Bioinformatics* [Internet]. 2007 Sep 1 [cited 2020 Dec 23];23(17):2334–6.  
1005 Available from: [https://academic.oup.com/bioinformatics/article-](https://academic.oup.com/bioinformatics/article-lookup/doi/10.1093/bioinformatics/btm331)  
1006 [lookup/doi/10.1093/bioinformatics/btm331](https://academic.oup.com/bioinformatics/article-lookup/doi/10.1093/bioinformatics/btm331)
- 1007 57. Goodstein DM, Shu S, Howson R, Neupane R, Hayes RD, Fazo J, et al. Phytozome:  
1008 A comparative platform for green plant genomics. *Nucleic Acids Res* [Internet].  
1009 2012 Jan [cited 2020 Dec 23];40(D1). Available from:  
1010 <https://pubmed.ncbi.nlm.nih.gov/22110026/>
- 1011 58. Edgar RC. MUSCLE: Multiple sequence alignment with high accuracy and high  
1012 throughput. *Nucleic Acids Res* [Internet]. 2004 [cited 2020 Dec 23];32(5):1792–7.  
1013 Available from: <https://pubmed.ncbi.nlm.nih.gov/15034147/>
- 1014 59. Tamura K, Peterson D, Peterson N, Stecher G, Nei M, Kumar S. MEGA5: Molecular  
1015 Evolutionary Genetics Analysis Using Maximum Likelihood, Evolutionary Distance,  
1016 and Maximum Parsimony Methods. *Mol Biol Evol* [Internet]. 2011 Oct 1 [cited 2020  
1017 Dec 23];28(10):2731–9. Available from: [https://academic.oup.com/mbe/article-](https://academic.oup.com/mbe/article-lookup/doi/10.1093/molbev/msr121)  
1018 [lookup/doi/10.1093/molbev/msr121](https://academic.oup.com/mbe/article-lookup/doi/10.1093/molbev/msr121)
- 1019 60. Stamatakis A. RAxML version 8: A tool for phylogenetic analysis and post-analysis  
1020 of large phylogenies. *Bioinformatics* [Internet]. 2014 May 1 [cited 2020 Dec  
1021 23];30(9):1312–3. Available from: [/pmc/articles/PMC3998144/?report=abstract](https://pubmed.ncbi.nlm.nih.gov/24752661/)
- 1022 61. Letunic I, Bork P. Interactive Tree of Life (iTOL) v4: Recent updates and new  
1023 developments. *Nucleic Acids Res* [Internet]. 2019 Jul 1 [cited 2020 Dec  
1024 23];47(W1). Available from: <https://pubmed.ncbi.nlm.nih.gov/30931475/>
- 1025 62. Chiasson D, Giménez-Oya V, Bircheneder M, Bachmaier S, Studtrucker T, Ryan J, et  
1026 al. A unified multi-kingdom Golden Gate cloning platform. *Sci Rep* [Internet]. 2019  
1027 Dec 1 [cited 2020 Dec 23];9(1). Available from:  
1028 <https://pubmed.ncbi.nlm.nih.gov/31300661/>
- 1029 63. Hinchliffe A, Harwood WA. *Agrobacterium*-mediated transformation of barley  
1030 immature embryos. In: *Methods in Molecular Biology*. Humana Press Inc.; 2019. p.  
1031 115–26.
- 1032 64. Kirschner GK, Stahl Y, Von Korff M, Simon R. Unique and Conserved Features of the  
1033 Barley Root Meristem. *Front Plant Sci* [Internet]. 2017 Jul 21 [cited 2020 Dec  
1034 23];8:1240. Available from:  
1035 <http://journal.frontiersin.org/article/10.3389/fpls.2017.01240/full>

1036

A

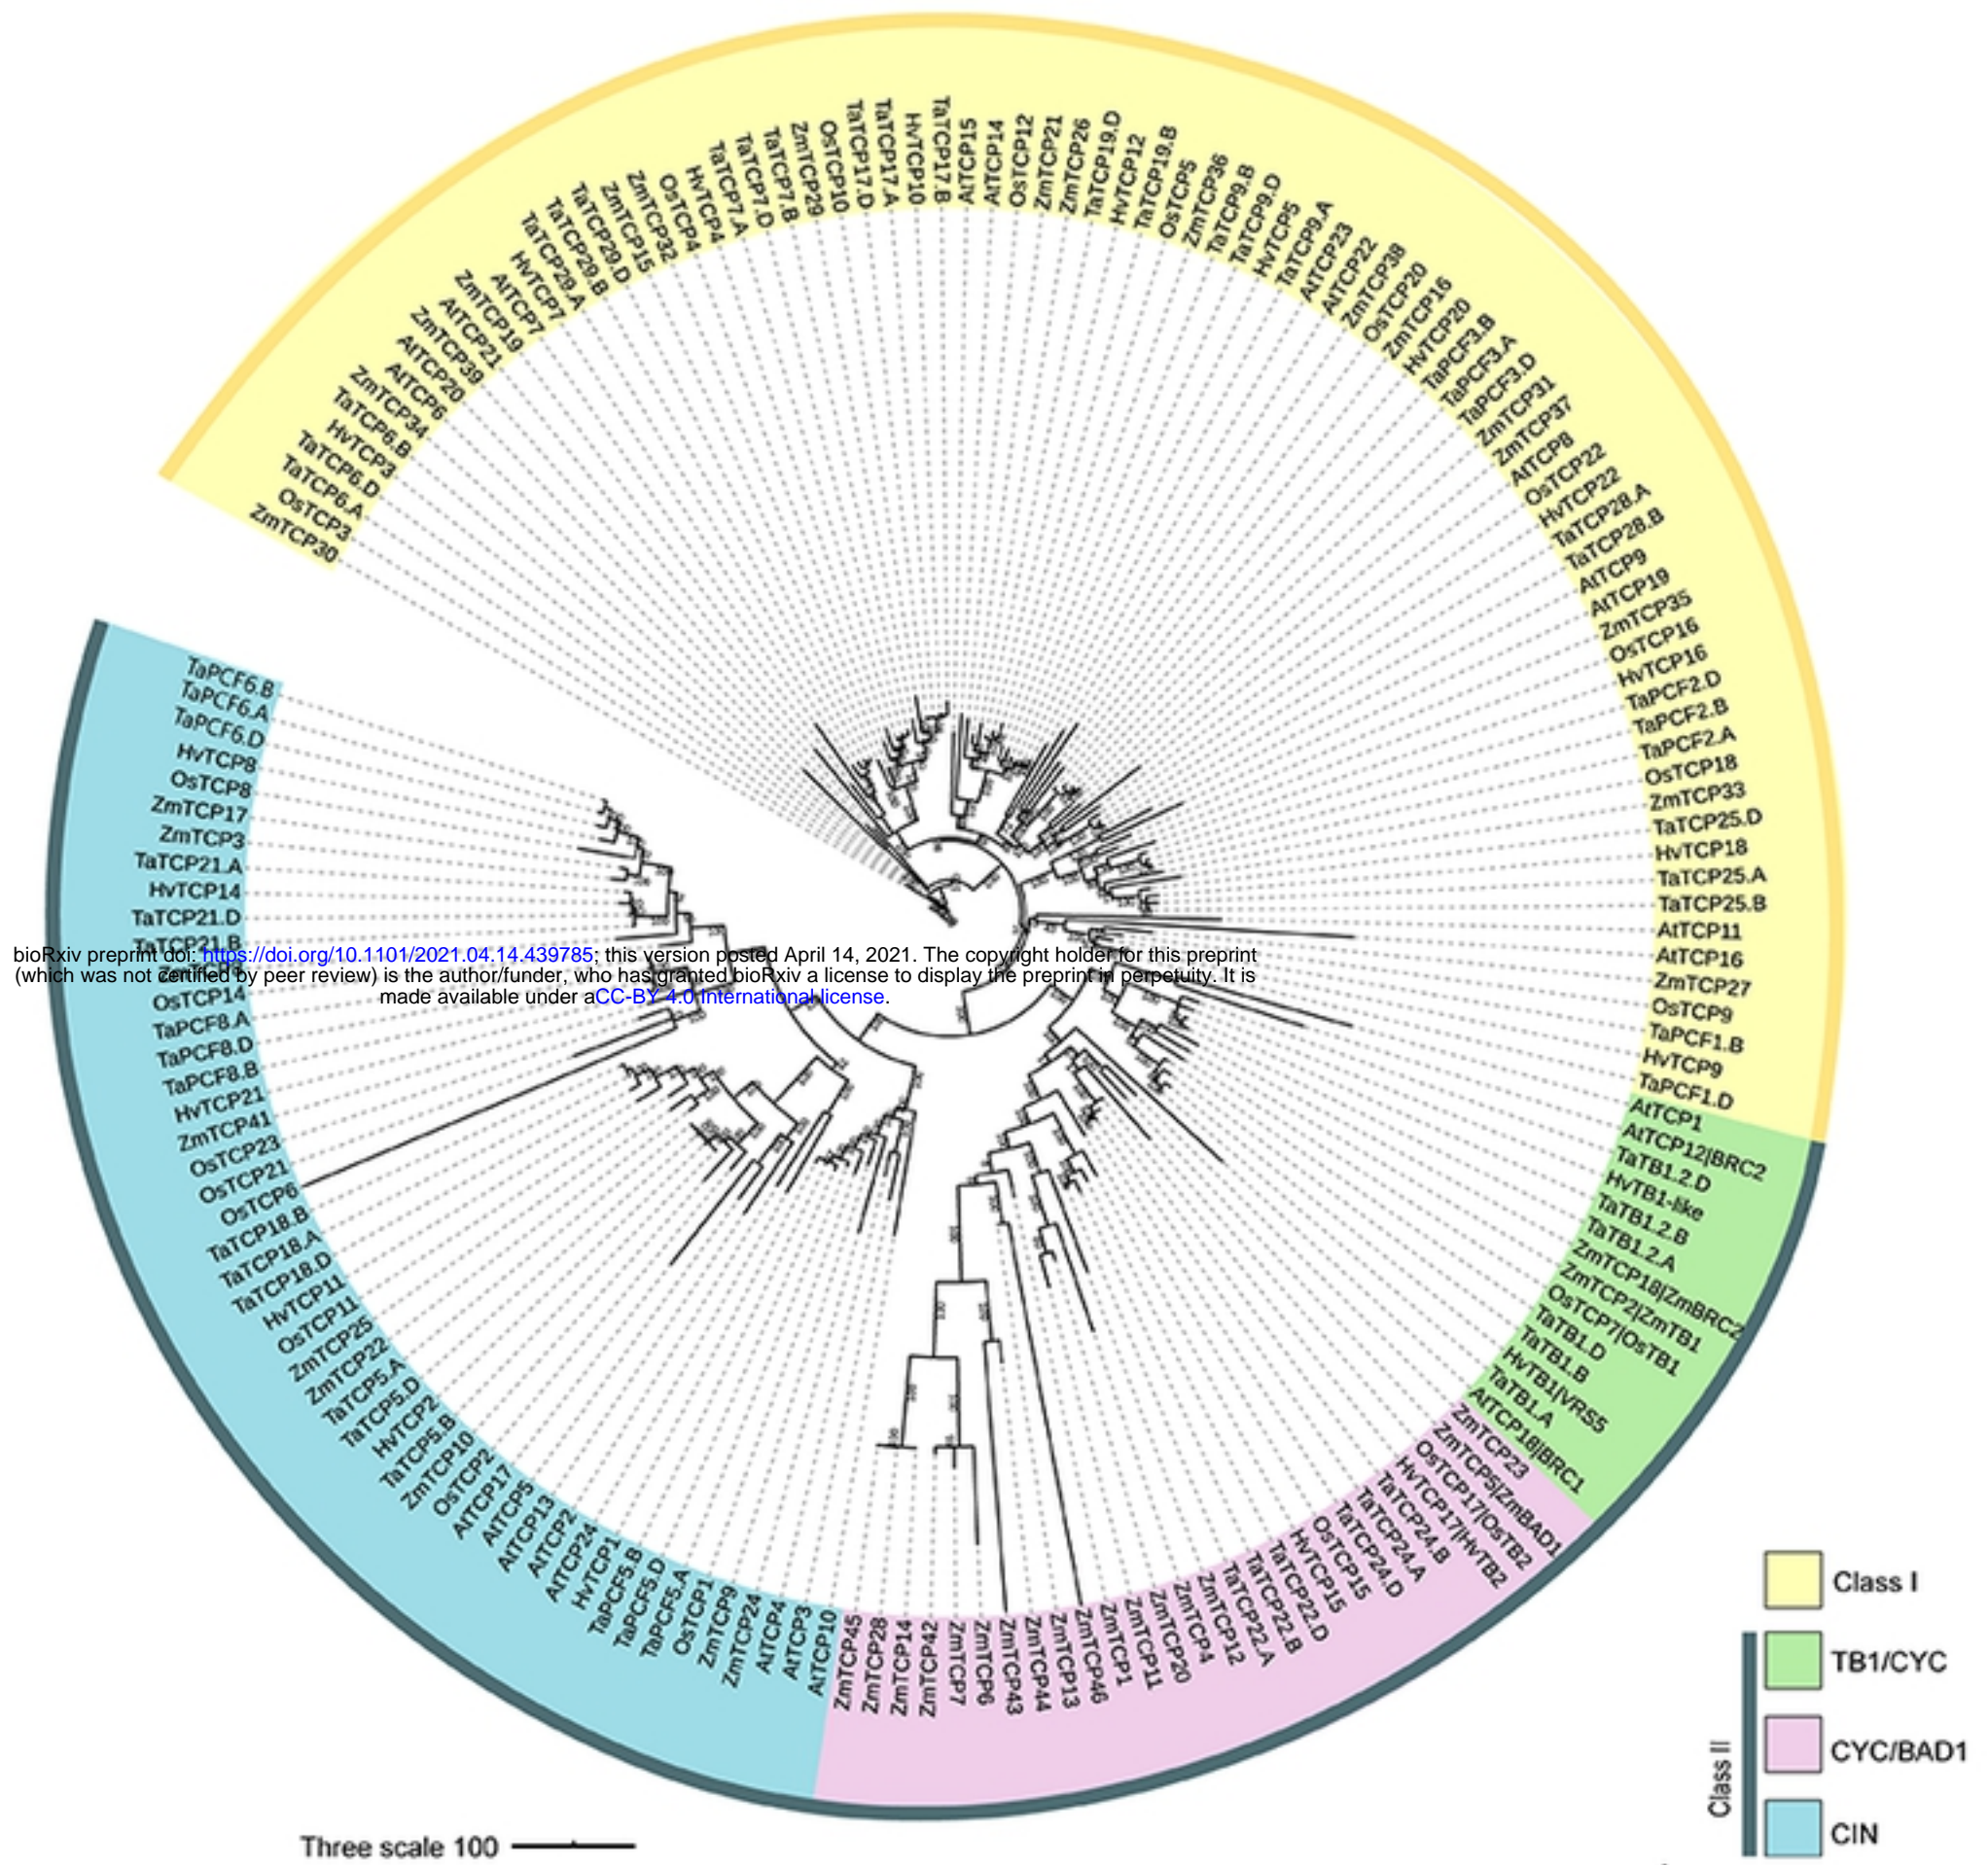

B

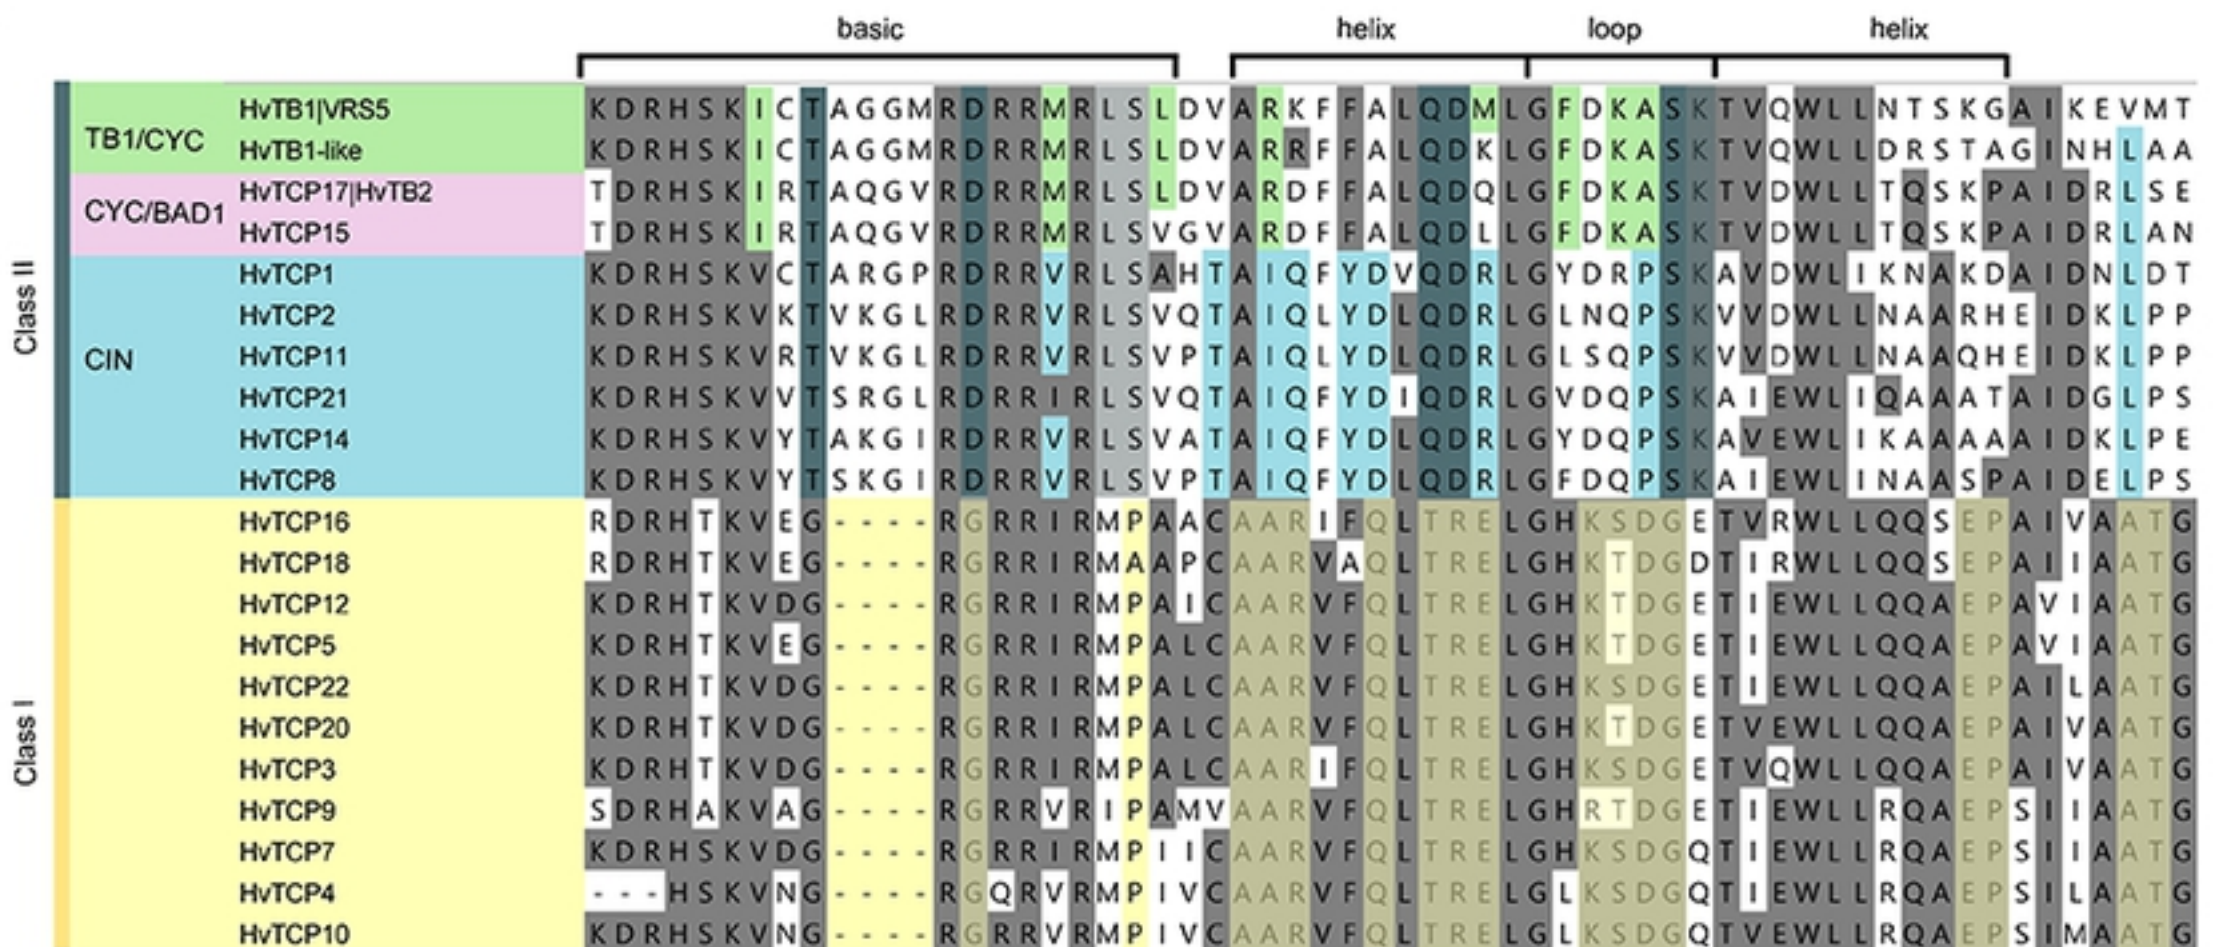

Figure 1

A

prey

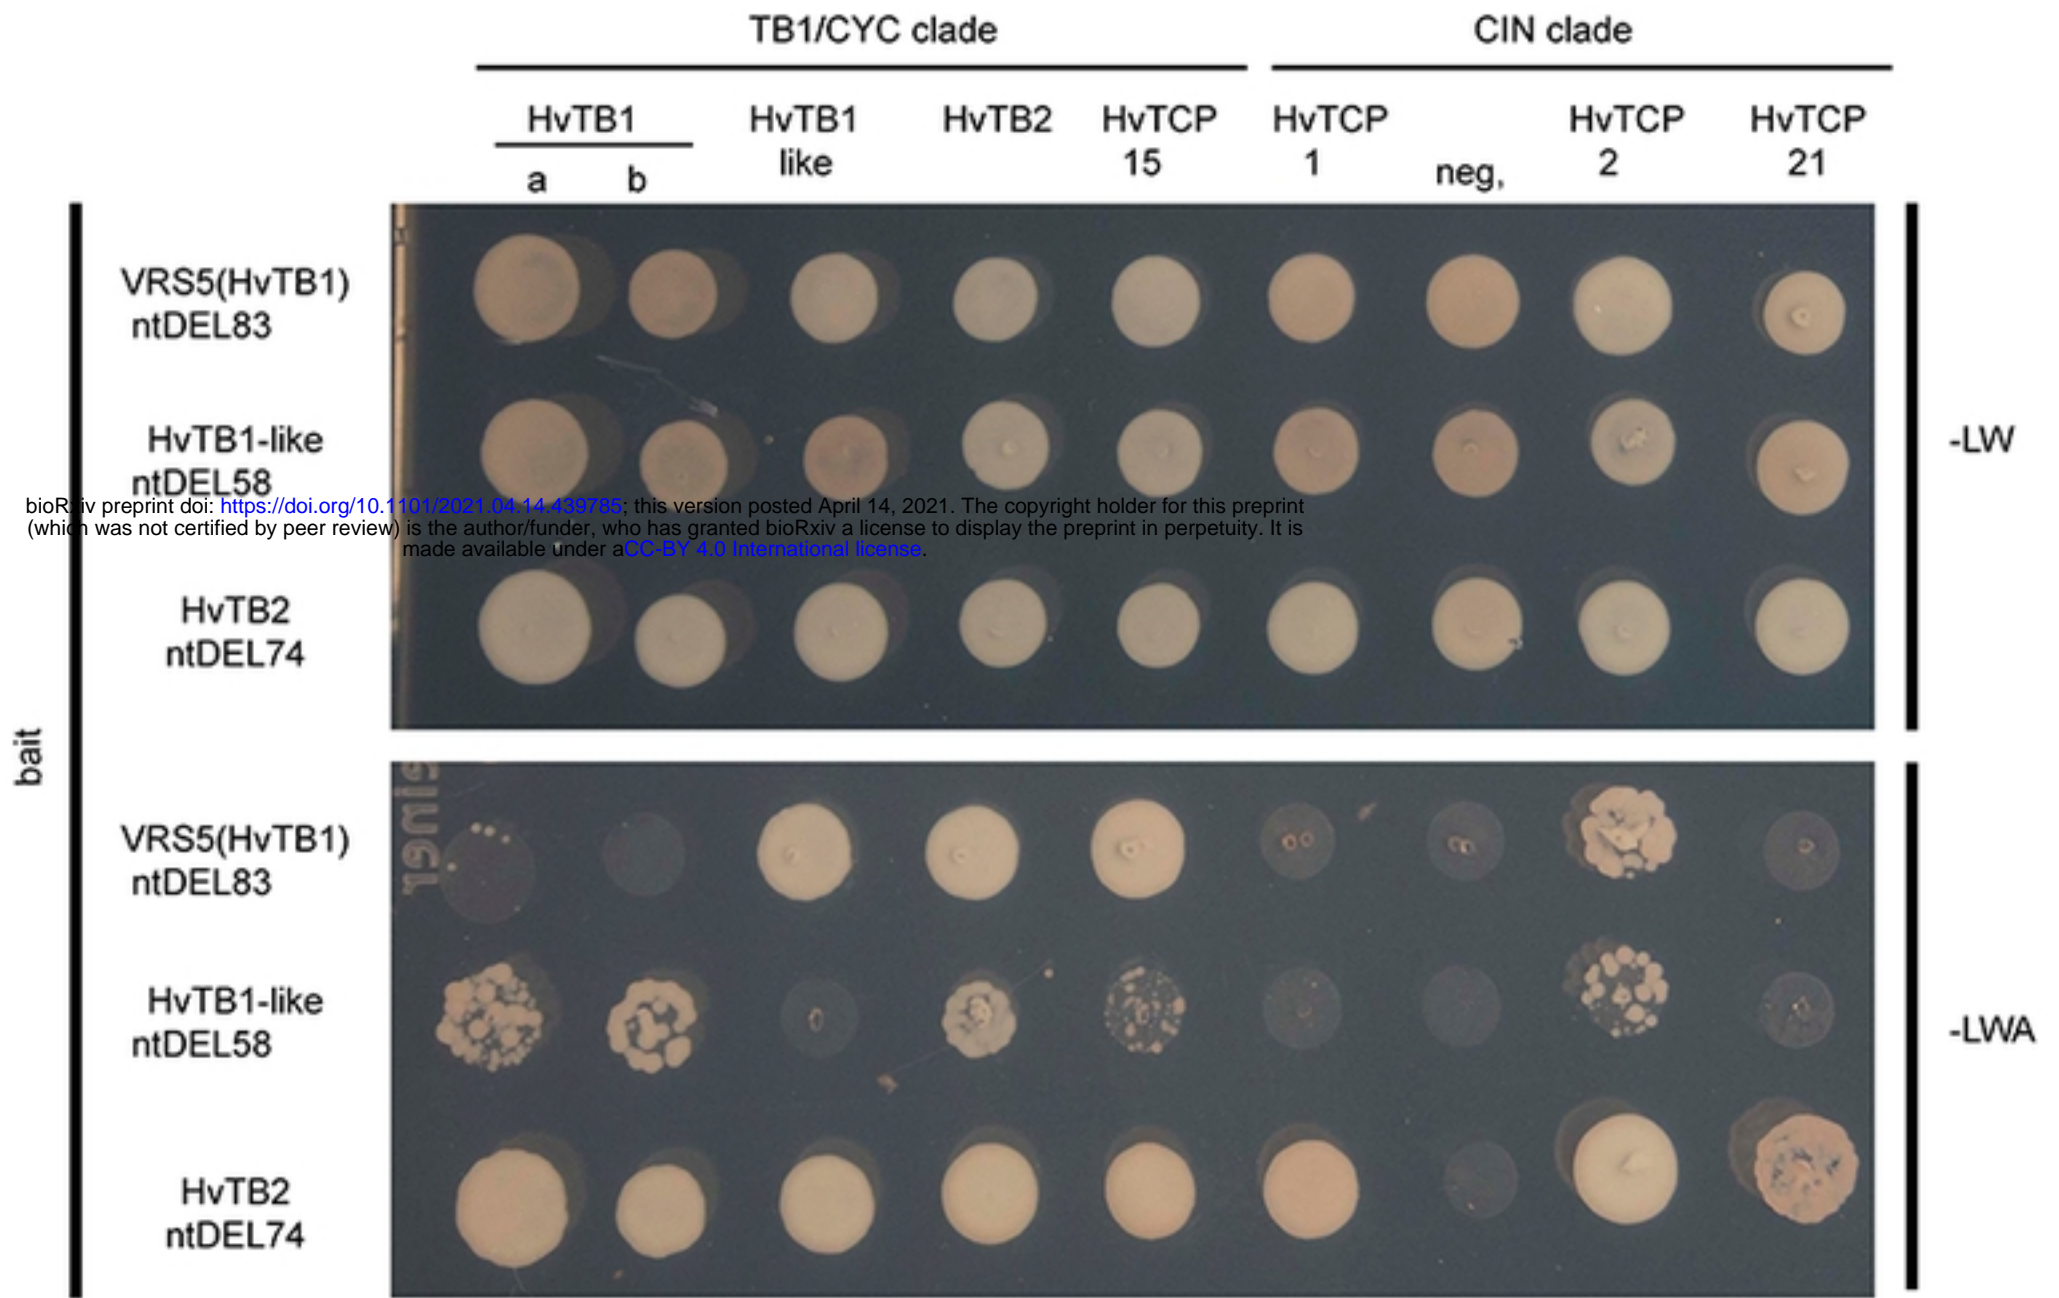

B

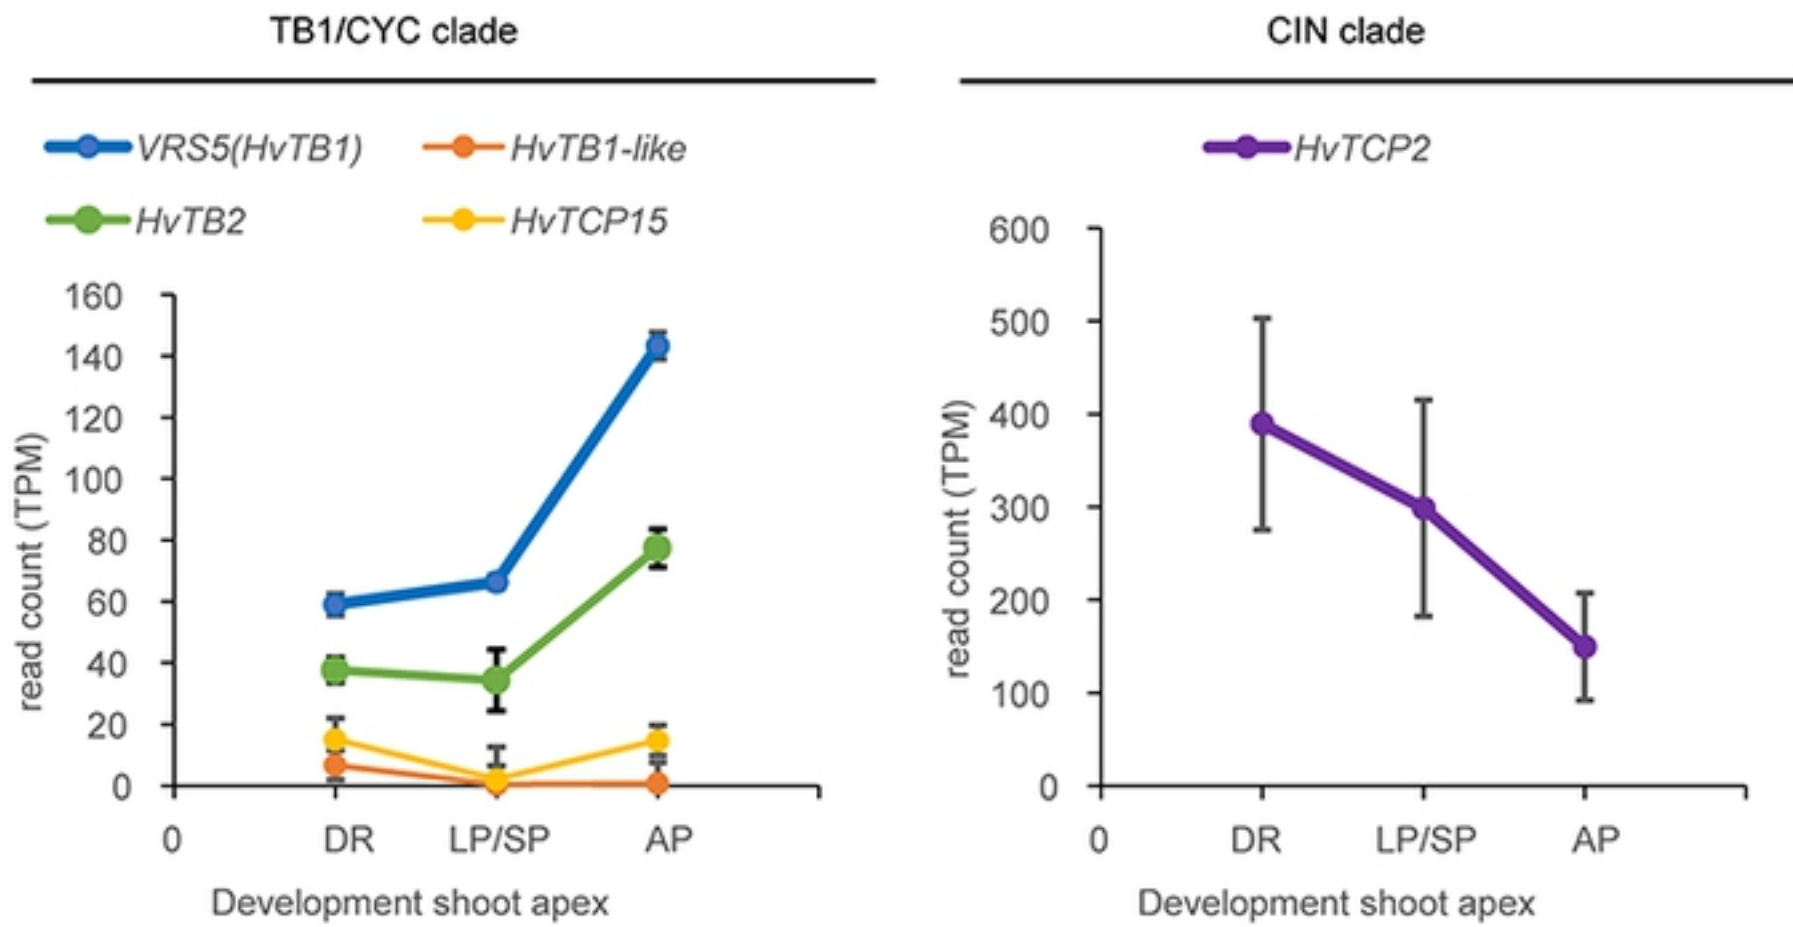

Figure 2

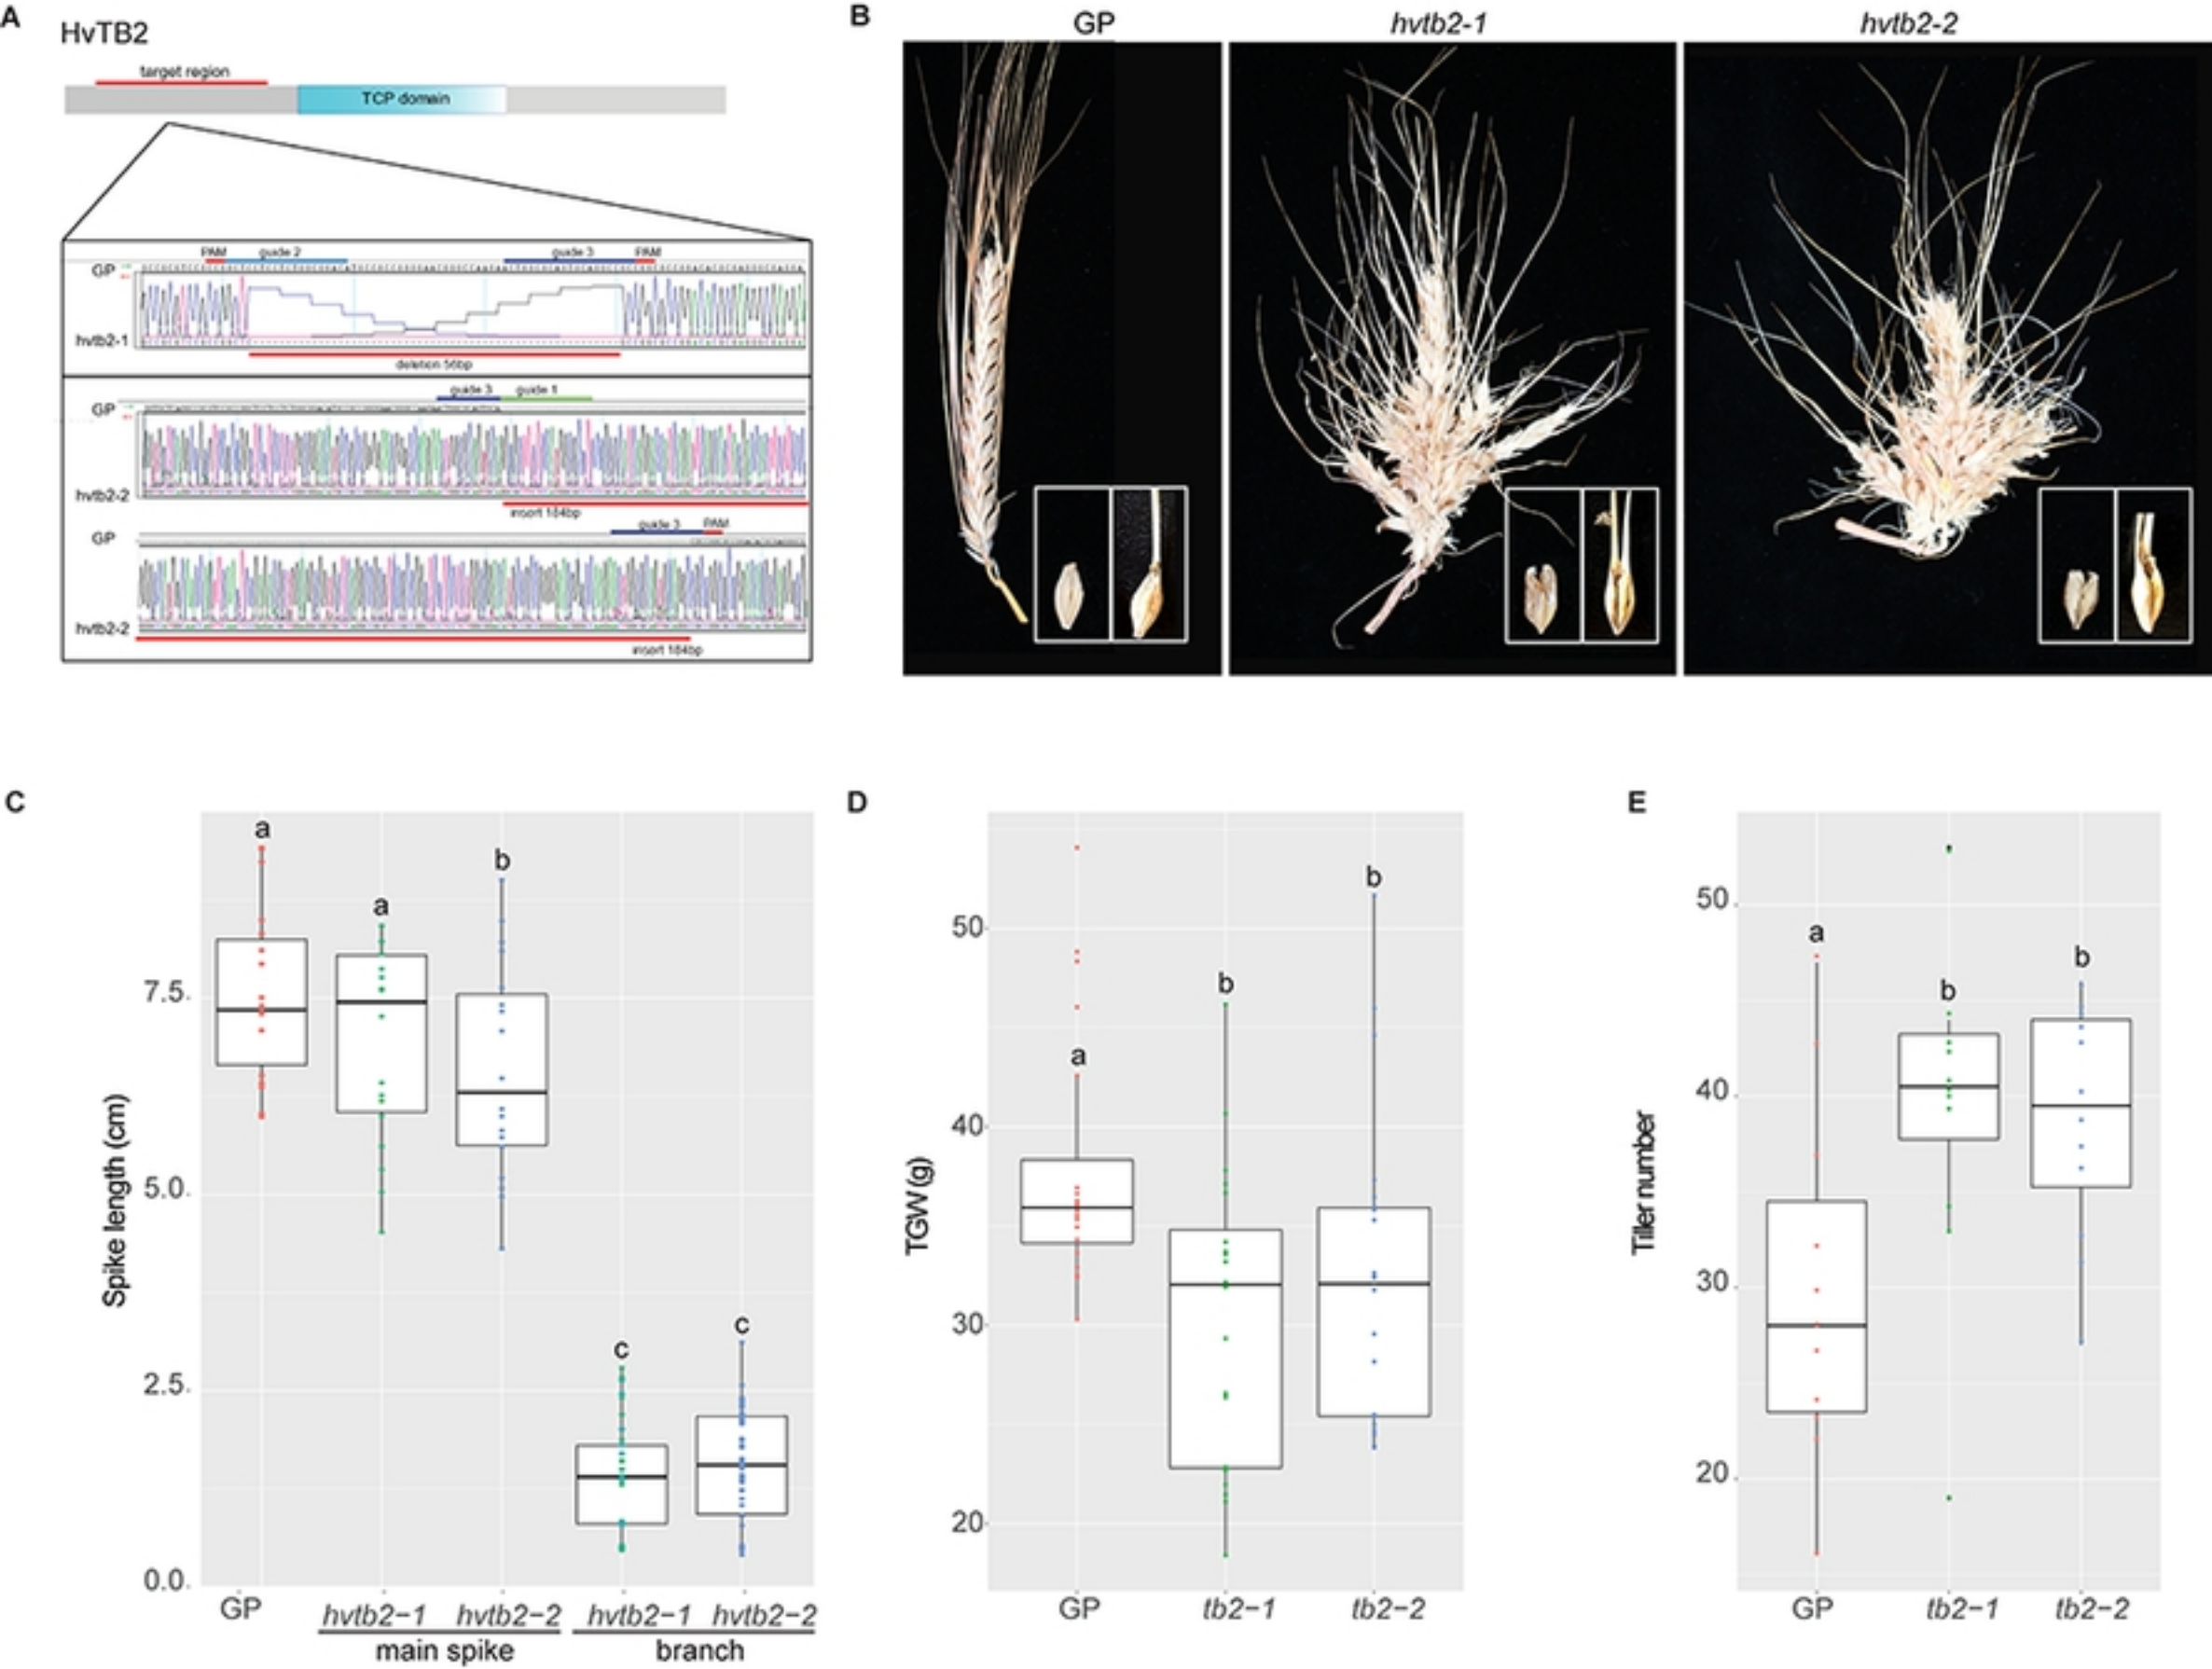

Figure 3



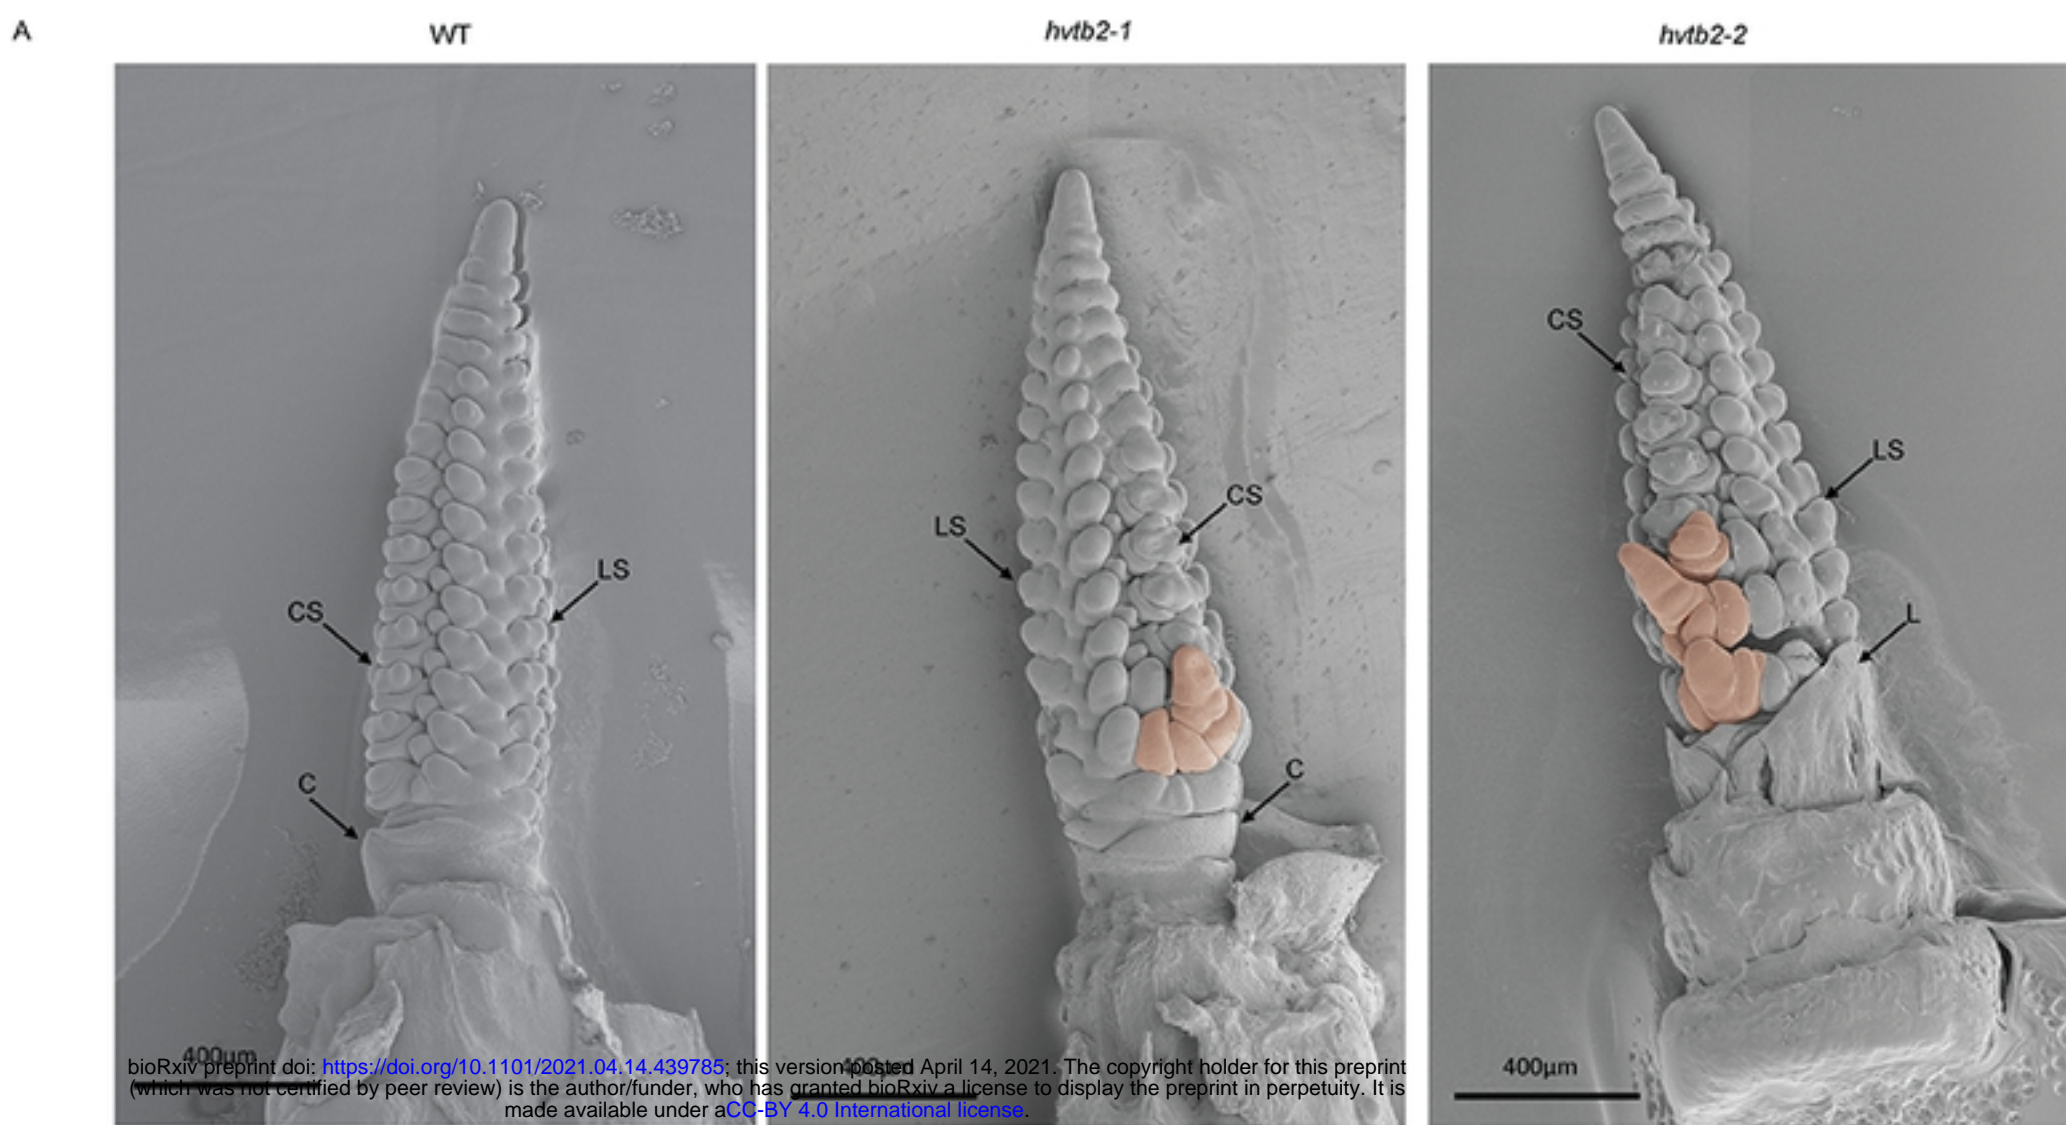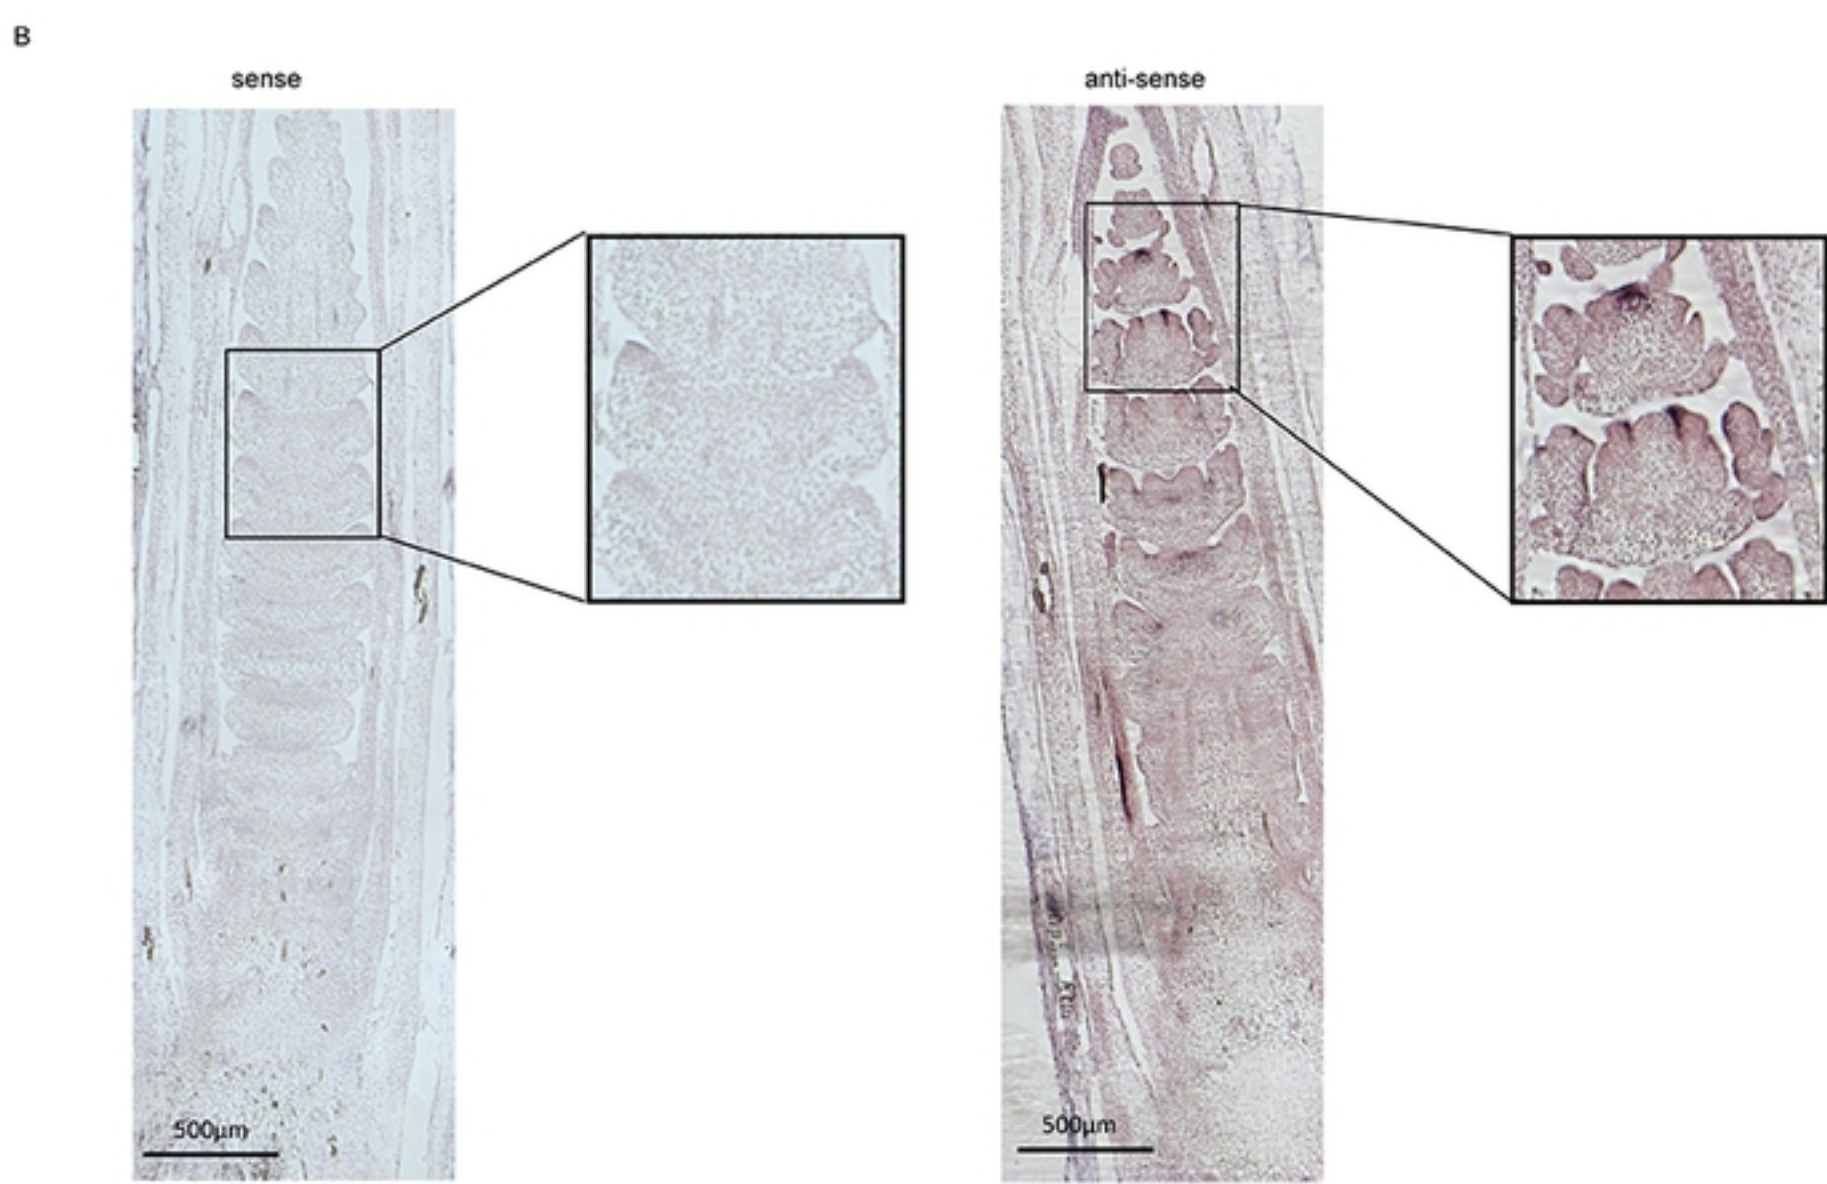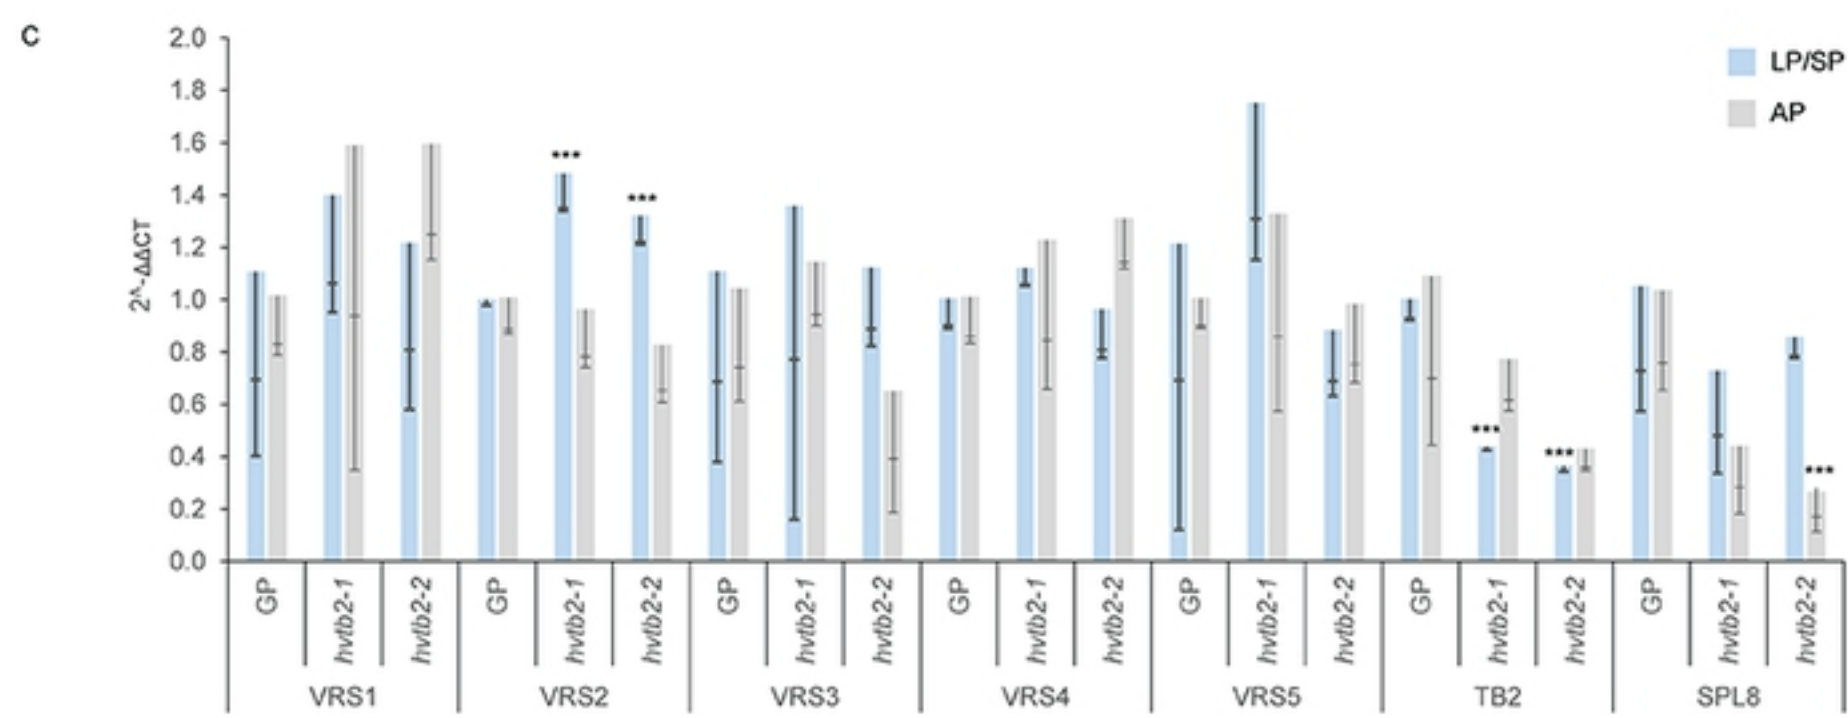

Figure 4

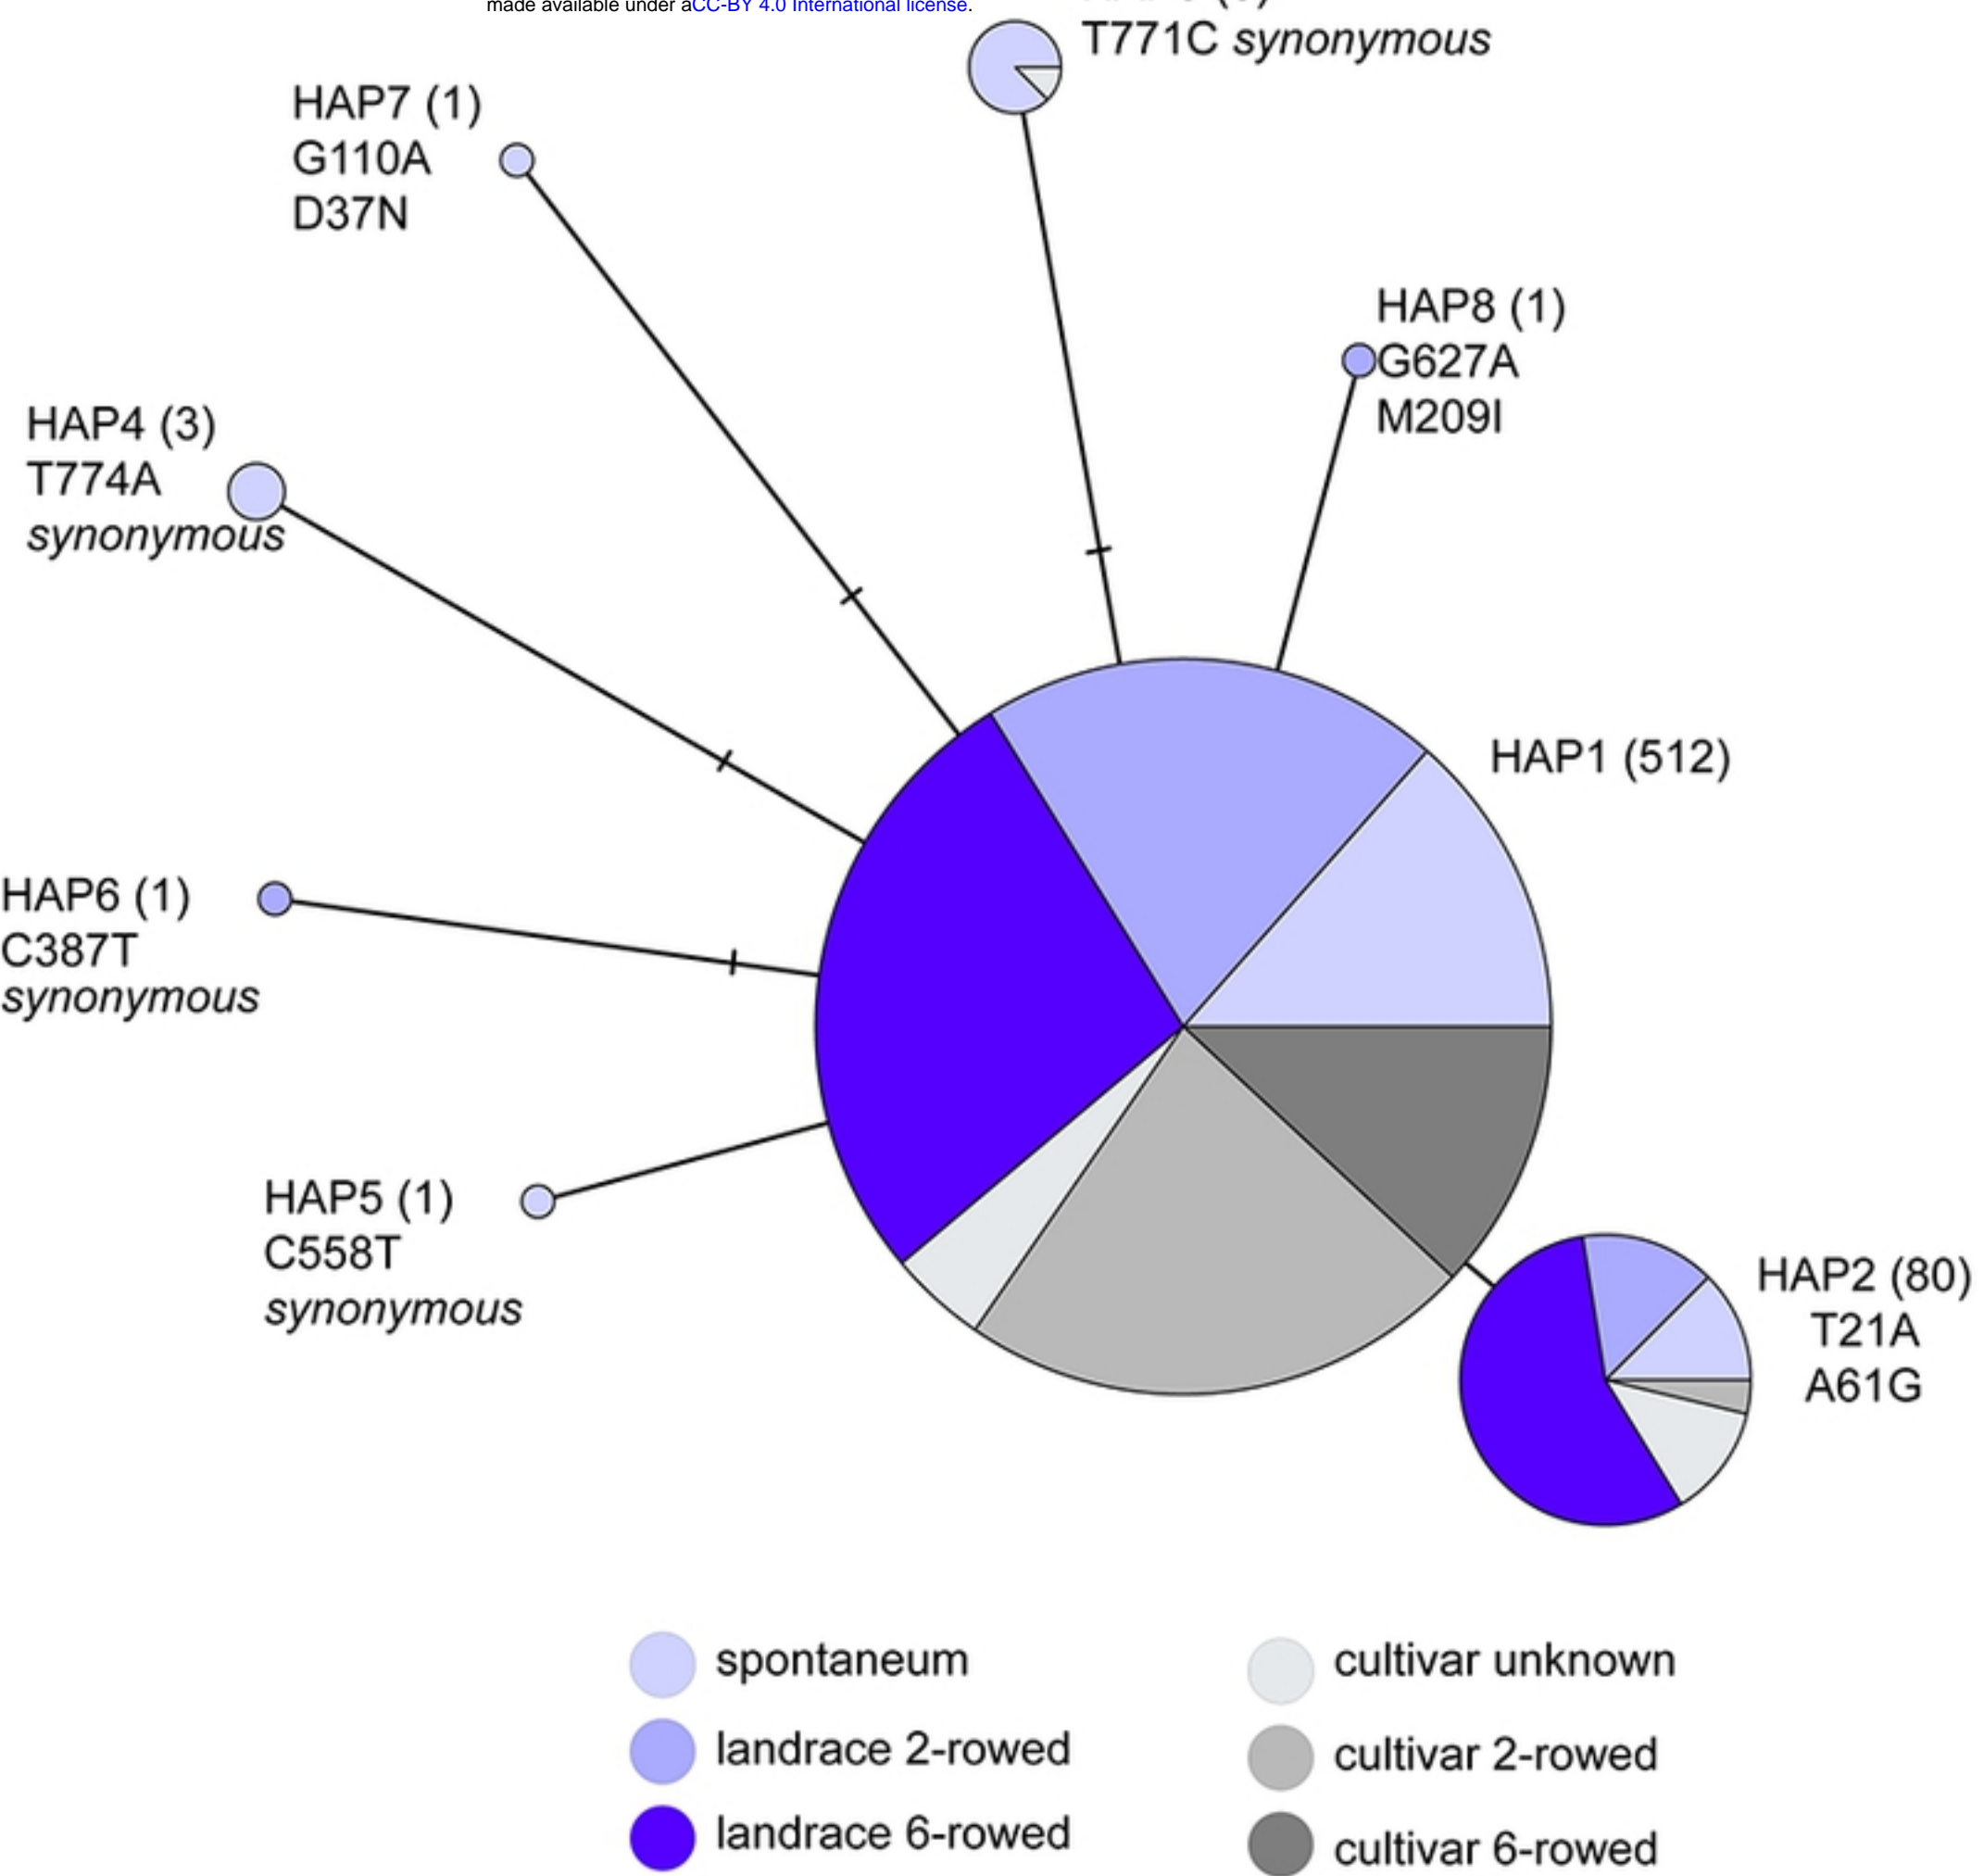

Figure 5
